# Supplementary material for: scRNA-seq in medulloblastoma shows cellular heterogeneity and lineage expansion support resistance to SHH inhibitor therapy
Source: PubMed Central journal article supplement (PMC6925218; doi:10.1038/s41467-019-13657-6), 2019-12-20
Supplement: 41467_2019_13657_MOESM3_ESM.pdf [file 41467_2019_13657_MOESM3_ESM.pdf]

## Description of Additional Supplementary Files

File Name: Supplementary Data 1

Description: cluster-specific differential expression profiles from vehicle-treated tumors.

File Name: Supplementary Data 2

Description: cluster-specific differential expression profiles from WT P7 cerebella.

File Name: Supplementary Data 3

Description: the top 50 genes at the extremes of the 4 ICs from the analysis of vehicle-treated tumors.

File Name: Supplementary Data 4

Description: the set of genes up-regulated in the *Sox2*<sup>+</sup> population compared to all other cells from vehicle-treated tumors.

File Name: Supplementary Data 5

Description: cluster-specific differential expression profiles from ICA of *Sox2*<sup>+</sup> cells from vehicle-treated tumors, showing distinct astrocytic, oligodendrocytic, AP-like, OPC-like and CGNP-like profiles.

File Name: Supplementary Data 6

Description: the top 50 genes at the extremes of the 4 ICs from the analysis of vismodegib-treated and control tumors.

File Name: Supplementary Data 7

Description: the set of genes differentially up-regulated in Cluster 0 in vehicle-treated tumors compared to all other vehicle-treated cells.

File Name: Supplementary Data 8

Description: the set of genes up-regulated in vismodegib-treated cells of Node A<sub>T</sub> compared to vehicle-treated cells of Node B<sub>T</sub>.

File Name: Supplementary Data 9

Description: the set of genes expression thresholds used to generate the feature plots.
