# Supplementary material for: scRNA-seq in medulloblastoma shows cellular heterogeneity and lineage expansion support resistance to SHH inhibitor therapy
Source: PubMed Central journal article supplement (PMC6925218; doi:10.1038/s41467-019-13657-6), 2019-12-20
Supplement: 41467_2019_13657_MOESM9_ESM.pdf [file 41467_2019_13657_MOESM9_ESM.pdf]

| IC1 Gene   | Gene Loading IC1 | IC2 Gene      | Gene Loading IC2 | IC3 Gene |
|------------|------------------|---------------|------------------|----------|
| Pcp4       | 17249            | Ckb           | 12408            | Neurod1  |
| Ntm        | 16404            | Tubb3         | 11077            | Stmn2    |
| Snca       | 15593            | Cntn2         | 11009            | Gap43    |
| Meg3       | 15384            | Tmsb4x        | 10178            | Cntn2    |
| Car10      | 14647            | Stmn2         | 10068            | Rtn1     |
| Mapt       | 14402            | Rtn1          | 9080             | Map1b    |
| Jph4       | 13552            | Neurod1       | 9042             | Tubb3    |
| Cadm2      | 13465            | Nhlh1         | 8584             | Stmn4    |
| Calb2      | 13380            | Pdzrn3        | 8529             | Celf4    |
| D3Bwg0562e | 13167            | Gng3          | 8180             | Gpm6a    |
| Celf4      | 13114            | Nrep          | 7904             | Nrxn1    |
| Neurod2    | 13110            | Gap43         | 7875             | Tubb2a   |
| Arpp21     | 13021            | Ina           | 7731             | Dpysl3   |
| Atp2b1     | 12874            | Dpysl3        | 7689             | Tmsb4x   |
| Cntn1      | 12758            | Stmn4         | 7424             | Sept3    |
| Camk4      | 12740            | Mllt11        | 7305             | Gng3     |
| Pvr13      | 12376            | BC005764      | 7290             | Mtss1    |
| Sez6       | 12343            | Sept3         | 7267             | St18     |
| Kcnd2      | 12125            | Tubb2a        | 7222             | Ppp1r14c |
| Gpm6a      | 12125            | Miat          | 7077             | Mapt     |
| Prkce      | 12123            | Chrna3        | 7031             | Nrep     |
| Grm1       | 11789            | Igfbpl1       | 6977             | Ina      |
| Spock2     | 11728            | Sept4         | 6974             | Cdk5r1   |
| Camk2d     | 11722            | Dcx           | 6930             | Elmo1    |
| Btbd3      | 11611            | Elavl4        | 6825             | Dner     |
| Lin7a      | 11566            | Trpc4ap       | 6761             | Rab3a    |
| Tspan4     | 11511            | Gpm6a         | 6759             | Dcx      |
| Ablim1     | 11507            | Elavl3        | 6726             | Trpc4ap  |
| Ryr2       | 11399            | Chgb          | 6589             | Mllt11   |
| Tenm1      | 11236            | Map1b         | 6570             | Tex14    |
| Dpp6       | 11231            | Rab3a         | 6557             | Nhlh2    |
| Adamts18   | 11199            | Rbfox3        | 6440             | Elavl3   |
| Grin1      | 11180            | Cdk5r1        | 6367             | Aplp1    |
| Nrep       | 10918            | Aplp1         | 6308             | Elavl4   |
| Fat2       | 10820            | 6330403K07Rik | 6295             | Sema6a   |
| Nrxn3      | 10770            | Tex14         | 6261             | Fxyd6    |
| Thra       | 10756            | Map2          | 6260             | Apc      |
| Cadps2     | 10645            | Myt1          | 6232             | Ank2     |
| Anks1b     | 10623            | Celf4         | 6048             | Kcnk1    |
| Nrxn2      | 10556            | A330076H08Rik | 6034             | Map2     |
| Synpr      | 10515            | Bin1          | 6031             | Arpp21   |
| Tspan7     | 10477            | Ppp1r14c      | 5988             | Chgb     |
| Runx1t1    | 10422            | Apc           | 5918             | Myt1l    |
| Diras2     | 10409            | Kif5c         | 5692             | Nhlh1    |
| Scg2       | 10392            | Nhlh2         | 5684             | L1cam    |
| Kcna1      | 10258            | Rab6b         | 5668             | Tagln3   |
| L1cam      | 10212            | Mtss1         | 5663             | Arl6ip1  |

|                 |       |               |        |                 |
|-----------------|-------|---------------|--------|-----------------|
| Ank2            | 10199 | St18          | 5590   | Tnik            |
| Gm12022         | 10076 | Nrxn1         | 5564   | B3galt2         |
| Ly6h            | 9949  | Itsn1         | 5494   | Sptbn1          |
| Tacc3           | -5082 | Hmgn5         | -9256  | Clspn           |
| Knstrn          | -5084 | Arl6ip1       | -9354  | Hmgn5           |
| Nusap1          | -5091 | Rrm2          | -9503  | Mycn            |
| Ckb             | -5113 | Hjrp          | -9835  | Jun             |
| Nasp            | -5134 | Ccdc34        | -9962  | CRE_RECOMBINASE |
| Hmmr            | -5183 | Nasp          | -10133 | Islr2           |
| Chrna3          | -5189 | Hirip3        | -10211 | Sdpr            |
| Prc1            | -5290 | Dlgap5        | -10313 | Ptch2           |
| Kif23           | -5315 | Nucks1        | -10395 | Rprml           |
| Spc25           | -5324 | Tuba1b        | -10854 | Pou3f2          |
| H2afx           | -5326 | Cks1b         | -10872 | Ccnd2           |
| Ckap2l          | -5364 | Ckap2         | -11923 | Sowaha          |
| Pdzrn3          | -5421 | Ccnb2         | -12046 | Pqlc1           |
| Cdk1            | -5481 | Arhgap11a     | -12154 | Tshz2           |
| Ranbp1          | -5496 | Knstrn        | -12177 | C1ql1           |
| Cks1b           | -5597 | Aspm          | -12386 | Baz1a           |
| Cdca8           | -5690 | Kif20b        | -12401 | Nasp            |
| Cdc20           | -5731 | Dek           | -12443 | Zfp361l1        |
| 2810417H13Rik   | -5800 | Esco2         | -12558 | Cltb            |
| Mycn            | -5825 | Sgol2         | -12597 | Boc             |
| Cenpe           | -5927 | Kif15         | -12717 | Ier5            |
| Mdk             | -5954 | Ncapg         | -12841 | Mmp14           |
| Insm1           | -5963 | Casc5         | -13014 | Pdgfa           |
| Birc5           | -5993 | Ccnb1         | -13080 | Dek             |
| Sept4           | -6029 | Mis18bp1      | -13081 | Dut             |
| C1ql1           | -6117 | RP23-45G16.5  | -13385 | Ntrk3           |
| Miat            | -6201 | Tacc3         | -13808 | Atoh1           |
| Cenpa           | -6226 | Cdc20         | -13892 | Rbp4            |
| Cenpf           | -6232 | Hmmr          | -14344 | Gpr153          |
| Top2a           | -6246 | Cenpa         | -14542 | Gm17322         |
| Ube2c           | -6292 | H2afx         | -14562 | Nop58           |
| Tpx2            | -6438 | Ckap2l        | -14567 | Hes1            |
| Mki67           | -6443 | 2810417H13Rik | -14813 | Gnai2           |
| RP23-45G16.5    | -6466 | Incenp        | -15096 | Tbata           |
| Tex14           | -6604 | Spc25         | -15116 | Hey1            |
| Smc2            | -6714 | Cenpe         | -15128 | Ranbp1          |
| Nhlh1           | -6863 | Kif23         | -15225 | Fam210b         |
| Hmgb2           | -6928 | Cdk1          | -15536 | Cbfa2t3         |
| Elavl2          | -7098 | Smc4          | -15899 | Sox9            |
| Nhlh2           | -7116 | Cdca8         | -15920 | Hells           |
| Smc4            | -7157 | Nusap1        | -16169 | Mdk             |
| CRE_RECOMBINASE | -7177 | Smc2          | -16196 | Lig1            |
| Nnat            | -7341 | Ube2c         | -16458 | Mcm3            |
| Lhx1            | -7475 | Hmgb2         | -16459 | Ung             |
| Pde1c           | -8167 | Birc5         | -16578 | Hsd11b2         |

|               |        |       |        |        |
|---------------|--------|-------|--------|--------|
| E130114P18Rik | -9635  | Prc1  | -16628 | Pcna   |
| Cog7          | -10111 | Cenpf | -17060 | Sfrp1  |
| Ccnd2         | -10165 | Tpx2  | -17133 | Srebf1 |
| Sfrp1         | -10762 | Mki67 | -18741 | Mcm6   |
| Igfbpl1       | -12652 | Top2a | -18846 | Ccnd1  |

| Gene Loading IC3 | IC4 Gene      | Gene Loading IC4 |
|------------------|---------------|------------------|
| 17176            | Ptprs         | 11791            |
| 15188            | Miat          | 10235            |
| 14408            | Xist          | 9795             |
| 14174            | Nfib          | 8684             |
| 13535            | Cntn2         | 7721             |
| 13289            | Reln          | 7151             |
| 12571            | Ank3          | 6987             |
| 12486            | Cacna2d1      | 6662             |
| 11902            | Insm1         | 6623             |
| 11706            | Gm26924       | 6596             |
| 11436            | Nhlh2         | 6513             |
| 10982            | Ankrd11       | 6306             |
| 10951            | Gria2         | 6193             |
| 10940            | Dync1h1       | 6019             |
| 10777            | Ppp3ca        | 5943             |
| 10621            | Clmp          | 5811             |
| 10211            | mt-Rnr1       | 5719             |
| 10117            | Ccdc88a       | 5618             |
| 10057            | Phf20l1       | 5578             |
| 9402             | Plxnb2        | 5574             |
| 9286             | Ankrd12       | 5544             |
| 9217             | Brsk2         | 5514             |
| 9206             | Sema6a        | 5513             |
| 9069             | Elavl3        | 5507             |
| 8770             | Map2          | 5482             |
| 8618             | Podxl2        | 5467             |
| 8579             | Flna          | 5407             |
| 8531             | Celsr2        | 5331             |
| 8462             | Nktr          | 5316             |
| 8414             | Mdga1         | 5057             |
| 8333             | Dcx           | 5051             |
| 8294             | 2700081O15Rik | 5046             |
| 8291             | Sptbn1        | 5032             |
| 8283             | Elavl2        | 5024             |
| 8247             | A930011O12Rik | 4941             |
| 8104             | Scn8a         | 4921             |
| 8071             | Mgat5b        | 4874             |
| 8061             | Zc3h13        | 4838             |
| 7969             | Prdm8         | 4820             |
| 7814             | Srcin1        | 4786             |
| 7801             | Kif1b         | 4784             |
| 7719             | Tmem259       | 4762             |
| 7693             | Kidins220     | 4743             |
| 7682             | Map1b         | 4705             |
| 7673             | Tnik          | 4688             |
| 7658             | Sema6c        | 4662             |
| 7624             | Zfp292        | 4634             |

|       |                 |       |
|-------|-----------------|-------|
| 7577  | Tnrc6a          | 4601  |
| 7511  | Atp9a           | 4563  |
| 7484  | BC005764        | 4554  |
| -5219 | Prc1            | -2744 |
| -5239 | Nucks1          | -2822 |
| -5321 | Hes1            | -2948 |
| -5471 | Tax1bp1         | -2976 |
| -5473 | Kif23           | -2983 |
| -5485 | Nusap1          | -3002 |
| -5491 | Aspm            | -3074 |
| -5672 | Cltb            | -3079 |
| -5673 | Atoh1           | -3088 |
| -5689 | Hmgb2           | -3092 |
| -5772 | Arhgap11a       | -3189 |
| -5818 | Sparcl1         | -3200 |
| -5864 | Pdzrn4          | -3241 |
| -5874 | Cdca8           | -3248 |
| -5875 | Cenpe           | -3254 |
| -5910 | Ccnd1           | -3428 |
| -6009 | Sowaha          | -3454 |
| -6156 | Cenpf           | -3606 |
| -6190 | Id2             | -3671 |
| -6242 | Dlgap5          | -3750 |
| -6366 | Sfrp1           | -3827 |
| -6404 | Gm2694          | -3895 |
| -6461 | Tpx2            | -3926 |
| -6477 | Lgals1          | -3952 |
| -6601 | Hmmr            | -3955 |
| -6644 | RP23-45G16.5    | -3960 |
| -6817 | Cdk1            | -3996 |
| -7095 | Vim             | -4109 |
| -7127 | Hpca            | -4198 |
| -7477 | Arl6ip1         | -4198 |
| -7534 | Birc5           | -4208 |
| -7727 | Tbata           | -4455 |
| -7762 | Rbp4            | -4480 |
| -7817 | Ckap2l          | -4502 |
| -7900 | E130114P18Rik   | -4641 |
| -8000 | Ranbp1          | -4734 |
| -8094 | Tmsb4x          | -4763 |
| -8180 | CRE_RECOMBINASE | -4825 |
| -8510 | H2afx           | -4990 |
| -8519 | Hist1h2ak       | -5015 |
| -8529 | Knstrn          | -5155 |
| -8618 | mt-Nd5          | -5173 |
| -8703 | Cks1b           | -5712 |
| -9012 | Ccnb1           | -5718 |
| -9027 | Ccnb2           | -6638 |

|        |        |       |
|--------|--------|-------|
| -9777  | Cdc20  | -6888 |
| -10415 | Pttg1  | -7489 |
| -10754 | Ube2c  | -7670 |
| -11203 | Cenpa  | -8021 |
| -12162 | mt-Nd1 | -8702 |

1  
2  
3  
4  
5  
6  
7  
8  
9  
10  
11  
12  
13  
14  
15  
16  
17  
18  
19  
20  
21  
22  
23  
24  
25  
26  
27  
28  
29  
30  
31  
32  
33  
34  
35  
36  
37  
38  
39  
40  
41  
42  
43  
44  
45  
46  
47

48  
49  
50  
51  
52  
53  
54  
55  
56  
57  
58  
59  
60  
61  
62  
63  
64  
65  
66  
67  
68  
69  
70  
71  
72  
73  
74  
75  
76  
77  
78  
79  
80  
81  
82  
83  
84  
85  
86  
87  
88  
89  
90  
91  
92  
93  
94  
95



96  
97  
98  
99  
100

1  
2  
3  
4  
5  
6  
7  
8  
9  
10  
11  
12  
13  
14  
15  
16  
17  
18  
19  
20  
21  
22  
23  
24  
25  
26  
27  
28  
29  
30  
31  
32  
33  
34  
35  
36  
37  
38  
39  
40  
41  
42  
43  
44  
45  
46  
47

48  
49  
50  
51  
52  
53  
54  
55  
56  
57  
58  
59  
60  
61  
62  
63  
64  
65  
66  
67  
68  
69  
70  
71  
72  
73  
74  
75  
76  
77  
78  
79  
80  
81  
82  
83  
84  
85  
86  
87  
88  
89  
90  
91  
92  
93  
94  
95

96  
97  
98  
99  
100

1  
2  
3  
4  
5  
6  
7  
8  
9  
10  
11  
12  
13  
14  
15  
16  
17  
18  
19  
20  
21  
22  
23  
24  
25  
26  
27  
28  
29  
30  
31  
32  
33  
34  
35  
36  
37  
38  
39  
40  
41  
42  
43  
44  
45  
46  
47

48  
49  
50  
51  
52  
53  
54  
55  
56  
57  
58  
59  
60  
61  
62  
63  
64  
65  
66  
67  
68  
69  
70  
71  
72  
73  
74  
75  
76  
77  
78  
79  
80  
81  
82  
83  
84  
85  
86  
87  
88  
89  
90  
91  
92  
93  
94  
95

96  
97  
98  
99  
100
