# Supplementary material for: scRNA-seq in medulloblastoma shows cellular heterogeneity and lineage expansion support resistance to SHH inhibitor therapy
Source: PubMed Central journal article supplement (PMC6925218; doi:10.1038/s41467-019-13657-6), 2019-12-20
Supplement: 41467_2019_13657_MOESM10_ESM.pdf [file 41467_2019_13657_MOESM10_ESM.pdf]

|         | p_val       | avg_logFC      | pct.Cluster0 | pct.AllOthers | p_val_adj   |
|---------|-------------|----------------|--------------|---------------|-------------|
| Rpl13a  |             | 0 0.437042593  | 0.977        | 0.913         | 0           |
| Rps5    |             | 0 0.430126209  | 0.985        | 0.944         | 0           |
| Rps14   |             | 0 0.403282137  | 0.982        | 0.94          | 0           |
| Tuba1a  |             | 0 -0.741963024 | 0.858        | 0.95          | 0           |
| Rtn1    |             | 0 -0.781283764 | 0.518        | 0.74          | 0           |
| Map1b   |             | 0 -0.884520861 | 0.358        | 0.653         | 0           |
| Gap43   |             | 0 -0.952991478 | 0.367        | 0.666         | 0           |
| Tubb3   |             | 0 -1.172262378 | 0.223        | 0.546         | 0           |
| Stmn2   |             | 0 -1.341248288 | 0.271        | 0.634         | 0           |
| Cntn2   |             | 0 -1.386584341 | 0.047        | 0.326         | 0           |
| Neurod1 |             | 0 -1.780023473 | 0.226        | 0.621         | 0           |
| Gnb2l1  |             | 0 0.441826047  | 0.935        | 0.853         | 4.1003E-305 |
| Rpl8    | 7.0433E-307 | 0.412225533    | 0.953        | 0.881         | 1.1748E-302 |
| Rps9    | 1.2475E-304 | 0.392851621    | 0.974        | 0.915         | 2.0809E-300 |
| Gpm6a   | 2.173E-302  | -0.926823803   | 0.19         | 0.472         | 3.6246E-298 |
| Arl6ip1 | 3.1651E-299 | -0.880699347   | 0.36         | 0.604         | 5.2794E-295 |
| Ube2c   | 3.9319E-297 | -1.276097579   | 0.08         | 0.323         | 6.5584E-293 |
| Tpx2    | 1.2565E-293 | -1.069658238   | 0.081        | 0.339         | 2.0958E-289 |
| Rps3    | 1.7825E-289 | 0.382436424    | 0.969        | 0.908         | 2.9732E-285 |
| Rplp1   | 7.4285E-278 | 0.400456256    | 0.951        | 0.855         | 1.2391E-273 |
| Top2a   | 1.3275E-276 | -1.059705631   | 0.252        | 0.478         | 2.2142E-272 |
| Stmn4   | 1.2E-275    | -1.005199309   | 0.134        | 0.401         | 2.0016E-271 |
| Nrxn1   | 1.5383E-270 | -0.965380192   | 0.116        | 0.376         | 2.5658E-266 |
| Tubb5   | 3.1447E-267 | -0.478753376   | 0.851        | 0.933         | 5.2453E-263 |
| Rpl32   | 3.5565E-267 | 0.395474175    | 0.948        | 0.872         | 5.9322E-263 |
| Celf4   | 3.503E-256  | -1.013004692   | 0.128        | 0.376         | 5.8431E-252 |
| Prc1    | 1.1501E-254 | -1.035594565   | 0.078        | 0.308         | 1.9184E-250 |
| Cenpf   | 1.1583E-254 | -1.119429622   | 0.173        | 0.416         | 1.932E-250  |
| Rplp2   | 2.3212E-253 | 0.4107213      | 0.916        | 0.818         | 3.8718E-249 |
| Nusap1  | 2.4021E-253 | -0.939868949   | 0.052        | 0.277         | 4.0067E-249 |
| Rps19   | 5.4498E-253 | 0.464460648    | 0.858        | 0.723         | 9.0902E-249 |
| Rpl4    | 4.2219E-251 | 0.379081229    | 0.952        | 0.895         | 7.0422E-247 |
| Rplp0   | 1.3584E-249 | 0.398554785    | 0.932        | 0.855         | 2.2659E-245 |
| Mki67   | 2.8339E-247 | -0.998216686   | 0.211        | 0.448         | 4.727E-243  |
| Birc5   | 2.2598E-246 | -0.901182018   | 0.087        | 0.327         | 3.7693E-242 |
| Ckap2l  | 2.8315E-243 | -0.869121106   | 0.048        | 0.266         | 4.723E-239  |
| Spc25   | 7.9248E-243 | -0.866107822   | 0.054        | 0.275         | 1.3219E-238 |
| Ddah2   | 2.8571E-242 | -0.607137506   | 0.508        | 0.737         | 4.7657E-238 |
| Kif23   | 1.0364E-236 | -0.886369094   | 0.049        | 0.262         | 1.7288E-232 |
| Nhlh2   | 1.9103E-233 | -0.76741019    | 0.221        | 0.481         | 3.1863E-229 |
| Tubb2b  | 2.1545E-233 | -0.691192939   | 0.263        | 0.522         | 3.5937E-229 |
| Draxin  | 4.3124E-231 | 0.573203554    | 0.708        | 0.509         | 7.1931E-227 |
| Hes1    | 2.6653E-223 | 0.899432748    | 0.286        | 0.108         | 4.4456E-219 |
| Sept3   | 1.5857E-221 | -0.756627714   | 0.211        | 0.444         | 2.645E-217  |
| Ina     | 8.6672E-217 | -0.703517018   | 0.253        | 0.498         | 1.4457E-212 |
| Cdk1    | 6.8344E-216 | -0.839456806   | 0.079        | 0.295         | 1.14E-211   |
| Cenpa   | 1.0959E-215 | -0.971616032   | 0.087        | 0.299         | 1.828E-211  |

|           |             |              |       |       |             |
|-----------|-------------|--------------|-------|-------|-------------|
| Tubb2a    | 7.5835E-215 | -0.855273614 | 0.08  | 0.292 | 1.2649E-210 |
| Cdca8     | 2.752E-214  | -0.802452065 | 0.091 | 0.314 | 4.5903E-210 |
| Rps20     | 3.2535E-214 | 0.41722107   | 0.879 | 0.748 | 5.4268E-210 |
| H2afx     | 6.4487E-214 | -0.852112999 | 0.171 | 0.376 | 1.0756E-209 |
| Ccnd1     | 6.8592E-214 | 0.56034816   | 0.69  | 0.473 | 1.1441E-209 |
| Rps26     | 5.5225E-213 | 0.384634192  | 0.921 | 0.825 | 9.2116E-209 |
| Calm2     | 7.251E-213  | -0.447528711 | 0.785 | 0.9   | 1.2095E-208 |
| Apoe      | 1.5744E-211 | -1.421613477 | 0.265 | 0.245 | 2.6261E-207 |
| Smc4      | 3.7287E-207 | -0.706289827 | 0.436 | 0.604 | 6.2194E-203 |
| Hmmr      | 3.8258E-207 | -0.84216831  | 0.034 | 0.218 | 6.3814E-203 |
| Rps21     | 3.1142E-204 | 0.387817381  | 0.9   | 0.813 | 5.1945E-200 |
| Gas5      | 3.6088E-203 | 0.430357344  | 0.819 | 0.719 | 6.0195E-199 |
| Eef1a1    | 1.0429E-201 | 0.367255891  | 0.933 | 0.869 | 1.7396E-197 |
| Rpl22     | 1.64E-201   | 0.405220592  | 0.867 | 0.765 | 2.7356E-197 |
| Kif11     | 2.4246E-198 | -0.714650081 | 0.055 | 0.249 | 4.0442E-194 |
| St18      | 8.7562E-196 | -0.806413086 | 0.047 | 0.232 | 1.4605E-191 |
| Cdc20     | 1.9531E-193 | -0.859182039 | 0.055 | 0.237 | 3.2578E-189 |
| Cdca3     | 7.9515E-191 | -0.746472024 | 0.069 | 0.266 | 1.3263E-186 |
| Fxyd6     | 1.0516E-188 | -0.577482398 | 0.322 | 0.563 | 1.7541E-184 |
| Elavl3    | 6.6866E-186 | -0.586706994 | 0.288 | 0.526 | 1.1153E-181 |
| Ccnb1     | 6.7941E-184 | -0.684049992 | 0.02  | 0.173 | 1.1333E-179 |
| Miat      | 2.0117E-183 | -0.645511702 | 0.33  | 0.569 | 3.3555E-179 |
| Rps15     | 1.2773E-182 | 0.372739989  | 0.855 | 0.768 | 2.1305E-178 |
| Ppp1r14c  | 1.4781E-182 | -0.754892534 | 0.108 | 0.307 | 2.4655E-178 |
| Incenp    | 5.6348E-180 | -0.757698904 | 0.112 | 0.322 | 9.3989E-176 |
| Map2      | 8.3181E-177 | -0.553670734 | 0.318 | 0.542 | 1.3875E-172 |
| Ccna2     | 1.6985E-175 | -0.656756255 | 0.073 | 0.264 | 2.8332E-171 |
| Rps11     | 6.8692E-175 | 0.379559601  | 0.853 | 0.755 | 1.1458E-170 |
| Cenpe     | 1.1171E-173 | -0.867524303 | 0.13  | 0.33  | 1.8634E-169 |
| Cbfa2t3   | 3.7517E-169 | 0.535493915  | 0.501 | 0.374 | 6.2578E-165 |
| Sptbn1    | 1.706E-168  | -0.611032913 | 0.189 | 0.401 | 2.8456E-164 |
| Gng3      | 3.286E-168  | -0.706488246 | 0.157 | 0.362 | 5.481E-164  |
| Cdk5r1    | 1.6374E-167 | -0.620674236 | 0.17  | 0.38  | 2.7311E-163 |
| Tagln3    | 3.1885E-167 | -0.612775824 | 0.137 | 0.34  | 5.3184E-163 |
| Hn1       | 5.8048E-166 | -0.5023608   | 0.367 | 0.592 | 9.6825E-162 |
| Eef1b2    | 1.385E-164  | 0.384095066  | 0.805 | 0.711 | 2.3101E-160 |
| Apc       | 1.0246E-163 | -0.552708992 | 0.26  | 0.481 | 1.7091E-159 |
| Npm1      | 6.5704E-163 | 0.411556466  | 0.742 | 0.618 | 1.0959E-158 |
| Pabpc1    | 1.7897E-159 | 0.317760648  | 0.93  | 0.863 | 2.9853E-155 |
| Sfrp1     | 3.4108E-159 | 0.397815627  | 0.897 | 0.786 | 5.6893E-155 |
| Aspm      | 7.9516E-159 | -0.649626919 | 0.028 | 0.175 | 1.3263E-154 |
| Hmgb2     | 1.3767E-157 | -0.659018922 | 0.247 | 0.444 | 2.2963E-153 |
| Mtss1     | 1.5308E-157 | -0.669312723 | 0.124 | 0.311 | 2.5533E-153 |
| Pbk       | 1.4349E-156 | -0.630232419 | 0.081 | 0.263 | 2.3933E-152 |
| Fam64a    | 8.1772E-156 | -0.525648209 | 0.016 | 0.147 | 1.364E-151  |
| Arhgap11a | 1.622E-155  | -0.620595546 | 0.047 | 0.206 | 2.7055E-151 |
| Chgb      | 3.4524E-155 | -0.725290645 | 0.101 | 0.281 | 5.7585E-151 |
| Basp1     | 6.5799E-155 | -0.464008684 | 0.577 | 0.741 | 1.0975E-150 |

|              |             |              |       |       |             |
|--------------|-------------|--------------|-------|-------|-------------|
| Gria2        | 1.5894E-153 | -0.533091085 | 0.355 | 0.568 | 2.651E-149  |
| Esco2        | 3.2345E-153 | -0.637283671 | 0.062 | 0.233 | 5.3952E-149 |
| Mis18bp1     | 1.1253E-152 | -0.600339769 | 0.042 | 0.195 | 1.8771E-148 |
| Tacc3        | 1.082E-151  | -0.572684747 | 0.071 | 0.245 | 1.8048E-147 |
| Sema6a       | 6.2705E-151 | -0.66232876  | 0.075 | 0.238 | 1.0459E-146 |
| Tex14        | 1.1021E-150 | -0.69910757  | 0.032 | 0.178 | 1.8383E-146 |
| Ckap5        | 1.3955E-150 | -0.570332648 | 0.117 | 0.308 | 2.3278E-146 |
| Tead2        | 4.8206E-150 | 0.507564649  | 0.37  | 0.251 | 8.0408E-146 |
| Casc5        | 4.0507E-149 | -0.592652492 | 0.059 | 0.223 | 6.7566E-145 |
| Dpysl3       | 3.8583E-147 | -0.715464944 | 0.086 | 0.258 | 6.4356E-143 |
| Rps2         | 5.7245E-147 | 0.403616754  | 0.518 | 0.429 | 9.5485E-143 |
| Mllt11       | 5.6878E-146 | -0.658137621 | 0.086 | 0.256 | 9.4872E-142 |
| Celf2        | 9.3536E-146 | -0.459169724 | 0.499 | 0.677 | 1.5602E-141 |
| Rpl41        | 1.35E-145   | 0.343934471  | 0.853 | 0.759 | 2.2519E-141 |
| Sgol2        | 4.3661E-144 | -0.607545061 | 0.041 | 0.19  | 7.2826E-140 |
| Ccnb2        | 1.3989E-143 | -0.615505267 | 0.062 | 0.223 | 2.3334E-139 |
| Kif22        | 4.8909E-143 | -0.52167582  | 0.046 | 0.196 | 8.158E-139  |
| Dner         | 1.3074E-142 | -0.619749638 | 0.082 | 0.253 | 2.1807E-138 |
| Srebf1       | 1.3945E-141 | 0.537956743  | 0.441 | 0.302 | 2.326E-137  |
| Gpr153       | 8.1124E-141 | 0.542107251  | 0.286 | 0.185 | 1.3531E-136 |
| Mapt         | 1.8159E-140 | -0.698678508 | 0.094 | 0.251 | 3.029E-136  |
| Ccng2        | 3.5197E-140 | -0.520272016 | 0.084 | 0.249 | 5.8709E-136 |
| Rpl14        | 2.2842E-139 | 0.352480642  | 0.763 | 0.677 | 3.81E-135   |
| Nuf2         | 6.1435E-139 | -0.522245112 | 0.033 | 0.172 | 1.0247E-134 |
| Ank3         | 7.1654E-139 | -0.503647974 | 0.267 | 0.464 | 1.1952E-134 |
| Ncapg        | 2.6456E-138 | -0.539230668 | 0.061 | 0.218 | 4.4128E-134 |
| Cdkn2d       | 3.2042E-138 | -0.503656452 | 0.045 | 0.189 | 5.3447E-134 |
| RP23-45G16.5 | 3.2536E-138 | -0.601594891 | 0.175 | 0.37  | 5.427E-134  |
| Rps18        | 1.3494E-137 | 0.409936159  | 0.496 | 0.409 | 2.2507E-133 |
| Racgap1      | 1.4191E-137 | -0.53583405  | 0.116 | 0.296 | 2.3671E-133 |
| Rpl39        | 3.8248E-137 | 0.372212455  | 0.723 | 0.623 | 6.3797E-133 |
| Rad21        | 5.5928E-137 | -0.519747355 | 0.304 | 0.507 | 9.3288E-133 |
| Ptn          | 8.7687E-137 | -0.639858473 | 0.305 | 0.481 | 1.4626E-132 |
| Zic1         | 4.6228E-136 | -0.394099089 | 0.687 | 0.812 | 7.7109E-132 |
| Rangap1      | 1.3723E-135 | -0.505490996 | 0.116 | 0.296 | 2.2891E-131 |
| Kif15        | 4.4542E-135 | -0.546856079 | 0.06  | 0.215 | 7.4297E-131 |
| Rps25        | 9.0975E-135 | 0.404838663  | 0.558 | 0.456 | 1.5175E-130 |
| Podxl2       | 4.1454E-134 | -0.555367645 | 0.1   | 0.264 | 6.9145E-130 |
| Cdca2        | 1.8813E-133 | -0.474206359 | 0.028 | 0.157 | 3.138E-129  |
| Kif5c        | 4.9042E-133 | -0.493115671 | 0.247 | 0.442 | 8.1802E-129 |
| Rps24        | 3.3643E-131 | 0.3041914    | 0.874 | 0.805 | 5.6117E-127 |
| Bin1         | 9.2589E-131 | -0.465333328 | 0.282 | 0.472 | 1.5444E-126 |
| Cbx5         | 1.4164E-130 | 0.387104671  | 0.736 | 0.629 | 2.3625E-126 |
| Elmo1        | 2.1937E-130 | -0.658844278 | 0.028 | 0.154 | 3.659E-126  |
| Nrep         | 6.2788E-130 | -0.448842482 | 0.452 | 0.603 | 1.0473E-125 |
| Mmp14        | 1.7008E-129 | 0.539276826  | 0.27  | 0.146 | 2.8369E-125 |
| Bub1         | 2.3772E-129 | -0.458858285 | 0.031 | 0.159 | 3.9651E-125 |
| Rps3a1       | 3.0913E-129 | 0.348180659  | 0.735 | 0.647 | 5.1563E-125 |

|                 |             |              |       |       |             |
|-----------------|-------------|--------------|-------|-------|-------------|
| Itm2b           | 6.4574E-129 | -0.404295104 | 0.53  | 0.675 | 1.0771E-124 |
| Rab3a           | 1.479E-128  | -0.605505847 | 0.043 | 0.18  | 2.4669E-124 |
| Nhlh1           | 2.1662E-128 | -0.62542023  | 0.101 | 0.258 | 3.6132E-124 |
| Ezr             | 2.4225E-128 | 0.425627893  | 0.509 | 0.417 | 4.0407E-124 |
| Gsg1l           | 9.5808E-128 | 0.473170388  | 0.331 | 0.233 | 1.5981E-123 |
| Slc17a6         | 1.2791E-127 | -0.573805987 | 0.042 | 0.178 | 2.1336E-123 |
| Rufy3           | 3.1244E-127 | -0.455216204 | 0.225 | 0.413 | 5.2116E-123 |
| Rpl23           | 5.0879E-127 | 0.360936182  | 0.596 | 0.522 | 8.4866E-123 |
| Barhl1          | 5.2844E-127 | 0.416837082  | 0.597 | 0.499 | 8.8144E-123 |
| Elavl4          | 1.28E-126   | -0.532081308 | 0.191 | 0.376 | 2.135E-122  |
| Uchl1           | 6.4168E-126 | -0.48344453  | 0.199 | 0.374 | 1.0703E-121 |
| Prmt8           | 8.0458E-126 | 0.501575854  | 0.355 | 0.248 | 1.342E-121  |
| Rpl26           | 1.4575E-123 | 0.334974172  | 0.762 | 0.684 | 2.4311E-119 |
| Kif20b          | 6.226E-123  | -0.570725708 | 0.072 | 0.225 | 1.0385E-118 |
| Jun             | 7.8066E-123 | 0.476903948  | 0.731 | 0.632 | 1.3021E-118 |
| Calm1           | 8.7849E-123 | -0.339590503 | 0.768 | 0.888 | 1.4653E-118 |
| Dcx             | 2.4553E-122 | -0.471782062 | 0.236 | 0.416 | 4.0954E-118 |
| Mxd3            | 1.4947E-121 | -0.430948598 | 0.031 | 0.154 | 2.4931E-117 |
| Rps15a          | 1.731E-121  | 0.339272719  | 0.717 | 0.639 | 2.8874E-117 |
| Hsd11b2         | 1.9194E-121 | 0.501079064  | 0.373 | 0.262 | 3.2016E-117 |
| Plk1            | 4.6953E-121 | -0.404435575 | 0.011 | 0.113 | 7.8317E-117 |
| Tmsb10          | 5.3839E-121 | -0.382013048 | 0.527 | 0.703 | 8.9804E-117 |
| Hes6            | 5.8808E-120 | 0.456251303  | 0.304 | 0.216 | 9.8093E-116 |
| Mcm6            | 7.7111E-120 | 0.471658373  | 0.348 | 0.255 | 1.2862E-115 |
| Rps10           | 3.9722E-119 | 0.322935549  | 0.699 | 0.618 | 6.6257E-115 |
| Rnd3            | 6.2489E-118 | 0.409471802  | 0.504 | 0.41  | 1.0423E-113 |
| Dlgap5          | 9.9646E-117 | -0.465126962 | 0.023 | 0.137 | 1.6621E-112 |
| Fnbp1l          | 2.2669E-116 | -0.410711256 | 0.31  | 0.495 | 3.7813E-112 |
| Nhp2            | 4.7591E-116 | 0.377801124  | 0.428 | 0.353 | 7.9381E-112 |
| Myt1            | 2.2748E-115 | -0.582426632 | 0.051 | 0.182 | 3.7944E-111 |
| Ank2            | 7.3777E-115 | -0.57811952  | 0.121 | 0.274 | 1.2306E-110 |
| Nkd1            | 1.5666E-114 | 0.44782349   | 0.318 | 0.228 | 2.613E-110  |
| Rpl34           | 2.1434E-114 | 0.317784362  | 0.702 | 0.638 | 3.5752E-110 |
| Tbata           | 5.7208E-114 | 0.505245912  | 0.414 | 0.318 | 9.5423E-110 |
| Prkcb           | 1.141E-113  | -0.485733186 | 0.127 | 0.293 | 1.9032E-109 |
| Myt1l           | 1.7157E-113 | -0.588172122 | 0.058 | 0.19  | 2.8618E-109 |
| Ndc80           | 1.9452E-113 | -0.430881609 | 0.026 | 0.14  | 3.2446E-109 |
| Calm3           | 2.3929E-113 | -0.337537439 | 0.407 | 0.604 | 3.9913E-109 |
| Aurka           | 2.7868E-113 | -0.3694774   | 0.018 | 0.121 | 4.6484E-109 |
| Rpl35a          | 4.912E-113  | 0.328796634  | 0.623 | 0.554 | 8.1933E-109 |
| Ctsb            | 4.7434E-112 | -0.601780386 | 0.182 | 0.285 | 7.9119E-108 |
| Aurkb           | 5.71E-112   | -0.428286492 | 0.045 | 0.171 | 9.5244E-108 |
| Kif2c           | 8.5684E-112 | -0.419589222 | 0.023 | 0.131 | 1.4292E-107 |
| Sept4           | 9.1773E-112 | -0.577835215 | 0.11  | 0.26  | 1.5308E-107 |
| D430041D05Rik   | 2.02E-111   | 0.388803443  | 0.558 | 0.472 | 3.3694E-107 |
| CRE_RECOMBINASE | 3.4127E-111 | 0.441252087  | 0.838 | 0.747 | 5.6923E-107 |
| Pax6            | 3.5128E-111 | -0.358652033 | 0.369 | 0.555 | 5.8594E-107 |
| Ckap2           | 4.6297E-111 | -0.453189763 | 0.059 | 0.193 | 7.7223E-107 |

|               |             |              |       |       |             |
|---------------|-------------|--------------|-------|-------|-------------|
| Itsn1         | 3.1697E-110 | -0.518182133 | 0.115 | 0.271 | 5.2871E-106 |
| Anln          | 8.6165E-110 | -0.389986938 | 0.022 | 0.128 | 1.4372E-105 |
| Knstrn        | 9.9731E-110 | -0.503881807 | 0.075 | 0.217 | 1.6635E-105 |
| Ntrk3         | 6.361E-109  | 0.44424756   | 0.209 | 0.139 | 1.061E-104  |
| Rpl7          | 8.1575E-108 | 0.323797653  | 0.554 | 0.496 | 1.3607E-103 |
| 1500012F01Rik | 1.3276E-107 | 0.387035174  | 0.459 | 0.38  | 2.2144E-103 |
| Srrm3         | 1.5009E-107 | -0.419422825 | 0.121 | 0.274 | 2.5035E-103 |
| Brd8          | 5.9139E-107 | -0.354529416 | 0.255 | 0.431 | 9.8644E-103 |
| Eno1          | 6.0844E-107 | 0.386079918  | 0.284 | 0.213 | 1.0149E-102 |
| Eif3f         | 2.6888E-106 | 0.286837836  | 0.673 | 0.618 | 4.485E-102  |
| Cdca7         | 3.955E-106  | 0.426743794  | 0.253 | 0.181 | 6.597E-102  |
| Bub1b         | 1.0592E-105 | -0.35919372  | 0.023 | 0.125 | 1.7668E-101 |
| Mdk           | 1.6948E-105 | 0.456762843  | 0.477 | 0.351 | 2.827E-101  |
| Rpl18a        | 1.7132E-105 | 0.342307712  | 0.451 | 0.386 | 2.8577E-101 |
| Sox9          | 4.1842E-105 | 0.471067878  | 0.33  | 0.233 | 6.9792E-101 |
| Atoh1         | 5.2016E-105 | 0.479997317  | 0.233 | 0.144 | 8.6763E-101 |
| Egr1          | 1.2304E-104 | 0.510389482  | 0.494 | 0.352 | 2.0524E-100 |
| Syt11         | 1.6628E-104 | -0.368413675 | 0.37  | 0.543 | 2.7736E-100 |
| Klc1          | 7.2259E-104 | -0.376892112 | 0.232 | 0.399 | 1.2053E-99  |
| Kif4          | 5.9385E-103 | -0.392335654 | 0.026 | 0.131 | 9.9054E-99  |
| Ctsd          | 4.5814E-102 | -0.594954806 | 0.162 | 0.179 | 7.6417E-98  |
| Dbf4          | 4.7509E-102 | -0.40472985  | 0.051 | 0.172 | 7.92445E-98 |
| Aplp1         | 1.2978E-101 | -0.54139839  | 0.056 | 0.179 | 2.16475E-97 |
| 2410006H16Rik | 2.5811E-101 | 0.360008093  | 0.512 | 0.443 | 4.30526E-97 |
| Trpc4ap       | 9.1778E-101 | -0.535485126 | 0.099 | 0.226 | 1.53086E-96 |
| B3galt2       | 9.4332E-101 | -0.504119223 | 0.021 | 0.12  | 1.57346E-96 |
| Ung           | 4.5905E-100 | 0.476293833  | 0.158 | 0.073 | 7.65692E-96 |
| Snhg1         | 1.5059E-99  | 0.374689928  | 0.42  | 0.339 | 2.5119E-95  |
| Cltb          | 1.6572E-99  | 0.370334034  | 0.479 | 0.406 | 2.76423E-95 |
| Serinc1       | 3.9601E-99  | -0.34894766  | 0.31  | 0.473 | 6.60545E-95 |
| Pde1c         | 5.2733E-99  | -0.464806481 | 0.262 | 0.423 | 8.7959E-95  |
| Ect2          | 1.17432E-98 | -0.339444502 | 0.022 | 0.119 | 1.95876E-94 |
| Mfap4         | 9.48063E-98 | 0.532507983  | 0.237 | 0.139 | 1.58137E-93 |
| Hey1          | 1.13344E-97 | 0.428535275  | 0.338 | 0.254 | 1.89058E-93 |
| Rbp4          | 2.76227E-97 | 0.452811505  | 0.308 | 0.222 | 4.60747E-93 |
| Rtn4          | 3.07622E-97 | -0.32349319  | 0.348 | 0.518 | 5.13113E-93 |
| Ncam1         | 1.95758E-96 | -0.331888838 | 0.26  | 0.424 | 3.26525E-92 |
| Ckb           | 4.19239E-96 | -0.321740923 | 0.755 | 0.823 | 6.99291E-92 |
| 1110038B12Rik | 4.3941E-96  | 0.331931936  | 0.337 | 0.287 | 7.32937E-92 |
| Ppic          | 6.54107E-96 | 0.398105725  | 0.302 | 0.221 | 1.09105E-91 |
| Spc24         | 7.85279E-96 | -0.425770406 | 0.127 | 0.276 | 1.30984E-91 |
| Kif20a        | 1.03899E-95 | -0.318865795 | 0.017 | 0.107 | 1.73303E-91 |
| Meg3          | 1.6288E-95  | -0.86680898  | 0.026 | 0.115 | 2.71684E-91 |
| Stxbp1        | 3.40398E-95 | -0.483241253 | 0.067 | 0.189 | 5.67783E-91 |
| Cst3          | 1.15627E-94 | -0.402500837 | 0.494 | 0.548 | 1.92865E-90 |
| Ier5          | 2.21792E-94 | 0.369774013  | 0.444 | 0.379 | 3.69949E-90 |
| Frmd4a        | 2.2756E-94  | -0.315669665 | 0.192 | 0.342 | 3.7957E-90  |
| Dync1i2       | 4.5161E-94  | -0.319379707 | 0.435 | 0.606 | 7.53285E-90 |

|               |             |              |       |       |             |
|---------------|-------------|--------------|-------|-------|-------------|
| Rpl18         | 8.72271E-94 | 0.271955014  | 0.325 | 0.298 | 1.45495E-89 |
| Uncx          | 1.02729E-93 | -0.390415206 | 0.203 | 0.351 | 1.71351E-89 |
| Sgol1         | 4.17944E-93 | -0.377245716 | 0.043 | 0.152 | 6.9713E-89  |
| Kcnk1         | 4.21365E-93 | -0.441027466 | 0.103 | 0.234 | 7.02837E-89 |
| Rps7          | 1.31468E-92 | 0.292273503  | 0.434 | 0.389 | 2.19288E-88 |
| Dhx32         | 2.07205E-92 | 0.373274885  | 0.247 | 0.186 | 3.45618E-88 |
| C330027C09Rik | 2.29519E-92 | -0.360374231 | 0.047 | 0.158 | 3.82838E-88 |
| Fbxo5         | 6.29032E-92 | -0.388046945 | 0.065 | 0.186 | 1.04923E-87 |
| Cadm3         | 6.50417E-92 | -0.522979917 | 0.054 | 0.166 | 1.0849E-87  |
| Stmn1         | 8.31258E-92 | -0.323357433 | 0.168 | 0.317 | 1.38654E-87 |
| A930011O12Rik | 1.37156E-91 | -0.524207082 | 0.035 | 0.137 | 2.28776E-87 |
| Ncapd2        | 1.77549E-91 | -0.352890798 | 0.087 | 0.213 | 2.96152E-87 |
| Ttk           | 3.62193E-91 | -0.305278856 | 0.021 | 0.109 | 6.04137E-87 |
| Ptms          | 3.71714E-91 | -0.314957438 | 0.351 | 0.509 | 6.20019E-87 |
| Gstm5         | 3.81469E-91 | 0.344165561  | 0.37  | 0.308 | 6.3629E-87  |
| Gm10260       | 9.8366E-90  | 0.32973986   | 0.268 | 0.216 | 1.64075E-85 |
| Zfp36l1       | 1.0844E-88  | 0.422251462  | 0.205 | 0.135 | 1.80877E-84 |
| Nucks1        | 1.99008E-88 | -0.357141554 | 0.569 | 0.689 | 3.31945E-84 |
| Clmp          | 3.56503E-88 | -0.470205326 | 0.135 | 0.273 | 5.94647E-84 |
| Mif           | 1.01436E-87 | 0.304737573  | 0.392 | 0.346 | 1.69195E-83 |
| Atp6v0e       | 1.13298E-87 | 0.288124697  | 0.437 | 0.399 | 1.88981E-83 |
| Sema7a        | 1.37018E-87 | 0.39903433   | 0.206 | 0.14  | 2.28545E-83 |
| Btg2          | 2.41127E-87 | 0.462560525  | 0.259 | 0.193 | 4.02201E-83 |
| Ier2          | 2.44324E-87 | 0.439875322  | 0.454 | 0.36  | 4.07532E-83 |
| Angptl2       | 3.08675E-87 | 0.393912457  | 0.165 | 0.102 | 5.14869E-83 |
| Siva1         | 5.75713E-87 | 0.343845129  | 0.318 | 0.259 | 9.60289E-83 |
| Lmnb1         | 7.09983E-87 | -0.294133245 | 0.186 | 0.332 | 1.18425E-82 |
| Eef1d         | 7.62164E-87 | 0.302867769  | 0.382 | 0.34  | 1.27129E-82 |
| Ppp3ca        | 8.08065E-87 | -0.31660818  | 0.271 | 0.409 | 1.34785E-82 |
| Pcsk1n        | 1.10033E-86 | -0.490242259 | 0.018 | 0.103 | 1.83536E-82 |
| Zeb1          | 1.25498E-86 | 0.312443999  | 0.424 | 0.376 | 2.0933E-82  |
| Ska2          | 2.69903E-86 | -0.352633039 | 0.105 | 0.233 | 4.50198E-82 |
| Nnat          | 7.8779E-86  | -0.369766295 | 0.625 | 0.734 | 1.31403E-81 |
| Ska1          | 8.69079E-86 | -0.308223371 | 0.022 | 0.109 | 1.44962E-81 |
| Ppp2r2b       | 1.0936E-85  | -0.447469431 | 0.018 | 0.103 | 1.82412E-81 |
| Loxl1         | 1.23331E-85 | 0.361665153  | 0.13  | 0.078 | 2.05717E-81 |
| Mns1          | 1.24599E-85 | -0.344848212 | 0.104 | 0.232 | 2.07831E-81 |
| Rps4x         | 1.99105E-85 | 0.294369202  | 0.322 | 0.287 | 3.32107E-81 |
| Pou3f2        | 3.92561E-85 | 0.351127418  | 0.313 | 0.264 | 6.54792E-81 |
| Sdpr          | 4.51259E-85 | 0.54095045   | 0.154 | 0.068 | 7.527E-81   |
| Tomm7         | 2.44808E-84 | 0.260740896  | 0.528 | 0.488 | 4.0834E-80  |
| Slc1a2        | 4.39829E-84 | 0.353733258  | 0.328 | 0.283 | 7.33636E-80 |
| Nsg2          | 4.66034E-84 | -0.291455552 | 0.37  | 0.521 | 7.77345E-80 |
| Cdh20         | 4.84998E-84 | 0.372917409  | 0.255 | 0.187 | 8.08977E-80 |
| Hspe1         | 7.42925E-84 | 0.296453943  | 0.38  | 0.329 | 1.2392E-79  |
| C1qbp         | 8.19163E-83 | 0.292060852  | 0.411 | 0.367 | 1.36636E-78 |
| BC005764      | 1.36046E-82 | -0.476561192 | 0.094 | 0.212 | 2.26925E-78 |
| Zmiz1         | 3.02383E-82 | 0.317418775  | 0.41  | 0.364 | 5.04374E-78 |

|           |             |              |       |       |             |
|-----------|-------------|--------------|-------|-------|-------------|
| Klf7      | 9.32668E-82 | -0.345182088 | 0.159 | 0.291 | 1.55569E-77 |
| Cnbp      | 1.17475E-81 | 0.259916546  | 0.783 | 0.727 | 1.95948E-77 |
| Rpl37     | 1.30441E-81 | 0.267847558  | 0.532 | 0.495 | 2.17576E-77 |
| Eef1g     | 1.58019E-81 | 0.271788449  | 0.363 | 0.326 | 2.63575E-77 |
| H1fx      | 1.65047E-81 | -0.323010871 | 0.143 | 0.274 | 2.75298E-77 |
| Gnai2     | 7.2128E-81  | 0.296213885  | 0.469 | 0.411 | 1.2031E-76  |
| Cxcr4     | 7.78319E-81 | 0.384417205  | 0.141 | 0.076 | 1.29824E-76 |
| Atp1b3    | 8.17657E-81 | -0.318690394 | 0.224 | 0.369 | 1.36385E-76 |
| App       | 1.22514E-80 | -0.279451852 | 0.456 | 0.6   | 2.04353E-76 |
| Elavl2    | 1.89504E-80 | -0.305219163 | 0.171 | 0.299 | 3.16092E-76 |
| Trim59    | 2.44519E-80 | -0.330518131 | 0.081 | 0.195 | 4.07858E-76 |
| Smpd2     | 2.67952E-80 | 0.323521556  | 0.194 | 0.157 | 4.46945E-76 |
| Plcb1     | 2.93433E-80 | -0.464588515 | 0.059 | 0.164 | 4.89446E-76 |
| Odf2      | 3.15109E-80 | -0.316198038 | 0.084 | 0.195 | 5.25602E-76 |
| Gm17322   | 4.55566E-80 | 0.452661648  | 0.194 | 0.112 | 7.59884E-76 |
| Tnik      | 4.9985E-80  | -0.465023693 | 0.062 | 0.17  | 8.33749E-76 |
| Gdpd1     | 7.37019E-80 | -0.299407231 | 0.145 | 0.271 | 1.22935E-75 |
| Stmn3     | 7.63899E-80 | -0.270470405 | 0.511 | 0.654 | 1.27418E-75 |
| Gnl3      | 2.73411E-79 | 0.352339453  | 0.343 | 0.282 | 4.5605E-75  |
| Gm8292    | 2.97685E-79 | 0.267542351  | 0.397 | 0.36  | 4.96538E-75 |
| Chd3      | 5.5971E-79  | -0.459795507 | 0.065 | 0.173 | 9.33596E-75 |
| Fabp7     | 7.32003E-79 | -0.884331803 | 0.096 | 0.13  | 1.22098E-74 |
| Rbfox2    | 1.14105E-78 | -0.369050636 | 0.18  | 0.313 | 1.90327E-74 |
| Wdr89     | 1.71795E-78 | 0.282828233  | 0.242 | 0.206 | 2.86554E-74 |
| Rpl37a    | 3.92375E-78 | 0.263601614  | 0.499 | 0.459 | 6.54481E-74 |
| Mrpl52    | 4.82763E-78 | 0.258333188  | 0.456 | 0.425 | 8.05249E-74 |
| Nrn1      | 5.51596E-78 | -0.397956831 | 0.124 | 0.249 | 9.20062E-74 |
| Gm13826   | 8.25605E-78 | 0.266223052  | 0.337 | 0.305 | 1.37711E-73 |
| Prdm8     | 1.30684E-77 | -0.45071617  | 0.05  | 0.148 | 2.1798E-73  |
| Rab6a     | 2.6406E-77  | -0.267816825 | 0.228 | 0.357 | 4.40451E-73 |
| Whsc1     | 3.58308E-77 | -0.274006771 | 0.34  | 0.5   | 5.97659E-73 |
| Arhgef2   | 5.36885E-77 | -0.301402465 | 0.182 | 0.311 | 8.95523E-73 |
| Arpp21    | 5.65688E-77 | -0.509252282 | 0.041 | 0.133 | 9.43567E-73 |
| Atp6v0b   | 5.89029E-77 | -0.309810199 | 0.172 | 0.295 | 9.825E-73   |
| Dkc1      | 1.19775E-76 | 0.312223789  | 0.375 | 0.32  | 1.99784E-72 |
| Rab6b     | 1.29823E-76 | -0.397668338 | 0.109 | 0.229 | 2.16544E-72 |
| Lrig3     | 6.88969E-76 | 0.343979627  | 0.208 | 0.159 | 1.1492E-71  |
| Nt5dc2    | 7.14012E-76 | -0.303326892 | 0.145 | 0.263 | 1.19097E-71 |
| Ncor2     | 8.30266E-76 | 0.335994568  | 0.203 | 0.158 | 1.38488E-71 |
| Rprml     | 1.1395E-75  | 0.424825803  | 0.128 | 0.067 | 1.90069E-71 |
| Efh2      | 1.48759E-75 | 0.396517184  | 0.177 | 0.116 | 2.4813E-71  |
| Melk      | 2.02599E-75 | -0.277503374 | 0.029 | 0.113 | 3.37935E-71 |
| Ldha      | 3.05346E-75 | 0.311837996  | 0.27  | 0.22  | 5.09317E-71 |
| Fyn       | 3.13184E-75 | -0.36778104  | 0.135 | 0.239 | 5.22391E-71 |
| Tspan13   | 5.31896E-75 | -0.304316208 | 0.118 | 0.233 | 8.87202E-71 |
| Olfm1     | 1.25308E-74 | -0.335846706 | 0.114 | 0.223 | 2.09014E-70 |
| Hist1h2ak | 1.26049E-74 | -0.458815808 | 0.062 | 0.166 | 2.1025E-70  |
| Boc       | 1.33988E-74 | 0.338845077  | 0.191 | 0.145 | 2.23492E-70 |

|               |             |              |       |       |             |
|---------------|-------------|--------------|-------|-------|-------------|
| Pdlim4        | 1.62715E-74 | 0.396153364  | 0.126 | 0.061 | 2.71408E-70 |
| Ttc9b         | 2.10567E-74 | -0.287127463 | 0.107 | 0.219 | 3.51226E-70 |
| Gm11478       | 2.5307E-74  | 0.29320684   | 0.246 | 0.205 | 4.2212E-70  |
| Clvs1         | 5.246E-74   | -0.390796632 | 0.053 | 0.151 | 8.75032E-70 |
| Polr2h        | 5.83625E-74 | 0.296583854  | 0.258 | 0.215 | 9.73487E-70 |
| Gnaq          | 7.93357E-74 | -0.291988083 | 0.189 | 0.312 | 1.32332E-69 |
| Tmsb4x        | 8.78923E-74 | -0.280238651 | 0.918 | 0.957 | 1.46604E-69 |
| Trp53         | 2.08417E-73 | 0.264814055  | 0.331 | 0.288 | 3.47639E-69 |
| Tubb4b        | 3.97711E-73 | -0.327277713 | 0.146 | 0.267 | 6.63382E-69 |
| Fam162a       | 4.08589E-73 | 0.251716823  | 0.323 | 0.288 | 6.81527E-69 |
| Rpl14-ps1     | 4.43353E-73 | 0.255073754  | 0.304 | 0.277 | 7.39514E-69 |
| Gdi1          | 4.64182E-73 | -0.324006295 | 0.138 | 0.256 | 7.74256E-69 |
| Diap3         | 5.17255E-73 | -0.288910542 | 0.038 | 0.126 | 8.62782E-69 |
| Ptch2         | 6.72151E-73 | 0.361727898  | 0.193 | 0.14  | 1.12115E-68 |
| Cdkn1b        | 7.78305E-73 | -0.274019175 | 0.349 | 0.501 | 1.29821E-68 |
| Srgap2        | 1.06384E-72 | -0.315598025 | 0.06  | 0.153 | 1.77449E-68 |
| Pea15a        | 1.84661E-72 | -0.41726236  | 0.09  | 0.2   | 3.08015E-68 |
| Anp32e        | 4.92313E-72 | -0.328314548 | 0.541 | 0.634 | 8.21178E-68 |
| Fam210b       | 9.00646E-72 | 0.334550333  | 0.369 | 0.297 | 1.50228E-67 |
| Sfrp2         | 1.71757E-71 | 0.30117505   | 0.176 | 0.139 | 2.8649E-67  |
| Sept11        | 1.82531E-71 | -0.273077199 | 0.217 | 0.352 | 3.04461E-67 |
| 1700025G04Rik | 3.23555E-71 | -0.316681152 | 0.168 | 0.291 | 5.39689E-67 |
| Prdx6         | 1.51947E-70 | 0.269268048  | 0.355 | 0.317 | 2.53448E-66 |
| Bola2         | 2.16073E-70 | 0.271555576  | 0.424 | 0.389 | 3.6041E-66  |
| Fstl1         | 2.33988E-70 | 0.344517341  | 0.234 | 0.164 | 3.90292E-66 |
| Mab211l1      | 5.07056E-70 | -0.335585123 | 0.134 | 0.251 | 8.45769E-66 |
| Afap1         | 7.27631E-70 | -0.31167205  | 0.075 | 0.174 | 1.21369E-65 |
| 2810417H13Rik | 7.49925E-70 | -0.41582094  | 0.278 | 0.424 | 1.25087E-65 |
| Mcm3          | 2.11003E-69 | 0.31873209   | 0.212 | 0.17  | 3.51953E-65 |
| Sowaha        | 3.04175E-69 | 0.457031252  | 0.229 | 0.143 | 5.07363E-65 |
| Ankrd12       | 4.12649E-69 | -0.362900831 | 0.181 | 0.301 | 6.88299E-65 |
| Nfyb          | 1.32982E-68 | -0.258384278 | 0.148 | 0.26  | 2.21814E-64 |
| Bub3          | 1.58747E-68 | -0.320701216 | 0.22  | 0.35  | 2.6479E-64  |
| Pqlc1         | 1.67199E-68 | 0.310434786  | 0.333 | 0.286 | 2.78888E-64 |
| Srm           | 2.58649E-68 | 0.304938282  | 0.226 | 0.181 | 4.31427E-64 |
| Pdgfa         | 3.409E-68   | 0.357769964  | 0.292 | 0.242 | 5.68622E-64 |
| Cadm1         | 3.82363E-68 | 0.267080381  | 0.416 | 0.383 | 6.37782E-64 |
| Mapk8ip1      | 4.56449E-68 | -0.297657814 | 0.139 | 0.253 | 7.61358E-64 |
| Smc2          | 6.91857E-68 | -0.369899806 | 0.495 | 0.56  | 1.15402E-63 |
| 2810004N23Rik | 6.98915E-68 | 0.281649685  | 0.29  | 0.254 | 1.16579E-63 |
| Mycn          | 8.50553E-68 | 0.312458005  | 0.4   | 0.352 | 1.41872E-63 |
| Cep170        | 1.90323E-67 | -0.311355464 | 0.209 | 0.333 | 3.17459E-63 |
| Gnao1         | 2.08787E-67 | -0.306961319 | 0.195 | 0.313 | 3.48257E-63 |
| Chrna3        | 6.36914E-67 | -0.391347651 | 0.048 | 0.138 | 1.06237E-62 |
| Nol4          | 1.6615E-66  | -0.253231394 | 0.096 | 0.193 | 2.77138E-62 |
| Myc           | 4.64673E-66 | 0.345476158  | 0.139 | 0.088 | 7.75075E-62 |
| Mad2l1        | 5.81062E-66 | -0.255538165 | 0.056 | 0.142 | 9.69211E-62 |
| Mybbp1a       | 5.88315E-66 | 0.264388542  | 0.275 | 0.242 | 9.81309E-62 |



|               |             |              |       |       |             |
|---------------|-------------|--------------|-------|-------|-------------|
| Irs1          | 7.29041E-66 | 0.326857454  | 0.152 | 0.108 | 1.21604E-61 |
| Isoc1         | 1.06846E-65 | 0.278268307  | 0.208 | 0.172 | 1.78218E-61 |
| Thra          | 1.40979E-65 | -0.382833969 | 0.149 | 0.252 | 2.35154E-61 |
| Nbea          | 1.54084E-65 | -0.339103596 | 0.108 | 0.214 | 2.57012E-61 |
| Vim           | 2.10808E-65 | 0.36692503   | 0.371 | 0.282 | 3.51628E-61 |
| Pkia          | 3.35533E-65 | -0.355337691 | 0.062 | 0.154 | 5.59669E-61 |
| Baz1a         | 4.26992E-65 | 0.30613014   | 0.192 | 0.159 | 7.12223E-61 |
| Cdk6          | 6.31582E-65 | 0.266482731  | 0.263 | 0.237 | 1.05348E-60 |
| Nrcam         | 6.99061E-65 | -0.35224131  | 0.061 | 0.155 | 1.16603E-60 |
| Ccm2          | 1.16674E-64 | 0.275394498  | 0.246 | 0.218 | 1.94613E-60 |
| Gli1          | 1.34792E-64 | 0.28245211   | 0.127 | 0.101 | 2.24834E-60 |
| Mcm2          | 1.35106E-64 | 0.315019325  | 0.24  | 0.194 | 2.25356E-60 |
| Prnp          | 2.76642E-64 | -0.3135947   | 0.124 | 0.23  | 4.61439E-60 |
| Etfb          | 4.97496E-64 | 0.252129901  | 0.203 | 0.179 | 8.29824E-60 |
| Pdgfra        | 5.85565E-64 | -0.29827107  | 0.106 | 0.203 | 9.76723E-60 |
| Tgfb2         | 7.5032E-64  | 0.346102728  | 0.232 | 0.18  | 1.25153E-59 |
| Rps16         | 9.77572E-64 | 0.251512535  | 0.229 | 0.203 | 1.63059E-59 |
| Npdc1         | 1.05867E-63 | -0.273030284 | 0.178 | 0.285 | 1.76587E-59 |
| Igsf21        | 3.07831E-63 | -0.381354068 | 0.03  | 0.106 | 5.13463E-59 |
| Cenpc1        | 1.08612E-62 | -0.251289628 | 0.083 | 0.175 | 1.81165E-58 |
| Cenpq         | 1.44879E-62 | -0.271580783 | 0.085 | 0.182 | 2.41658E-58 |
| Gsto1         | 3.73243E-62 | 0.334186258  | 0.171 | 0.116 | 6.2257E-58  |
| Cacng4        | 6.99007E-62 | -0.500355976 | 0.044 | 0.118 | 1.16594E-57 |
| 2900011O08Rik | 7.43049E-62 | -0.366649474 | 0.04  | 0.121 | 1.23941E-57 |
| Lpin2         | 1.30668E-61 | 0.296219387  | 0.202 | 0.173 | 2.17954E-57 |
| Bora          | 2.83238E-61 | -0.253547644 | 0.035 | 0.109 | 4.72441E-57 |
| Whrn          | 3.49627E-61 | 0.310170301  | 0.11  | 0.064 | 5.83178E-57 |
| Srrm4         | 3.77879E-61 | -0.305692781 | 0.119 | 0.217 | 6.30301E-57 |
| Rbfox1        | 1.06107E-60 | -0.338008908 | 0.033 | 0.109 | 1.76987E-56 |
| Rpa2          | 1.0794E-60  | 0.25379072   | 0.217 | 0.194 | 1.80044E-56 |
| Ap1s2         | 1.52292E-60 | -0.266125082 | 0.088 | 0.181 | 2.54022E-56 |
| Kif5a         | 1.70926E-60 | -0.384056709 | 0.06  | 0.147 | 2.85105E-56 |
| Abhd16a       | 2.35076E-60 | -0.305563185 | 0.113 | 0.211 | 3.92107E-56 |
| Dixdc1        | 3.94028E-60 | -0.26865654  | 0.156 | 0.257 | 6.57239E-56 |
| Mcm4          | 5.24922E-60 | 0.293938122  | 0.168 | 0.129 | 8.75569E-56 |
| Clasp2        | 6.67423E-60 | -0.278028748 | 0.095 | 0.188 | 1.11326E-55 |
| Nolc1         | 2.7941E-59  | 0.267347739  | 0.438 | 0.4   | 4.66055E-55 |
| Pnmal2        | 3.37932E-59 | -0.31234338  | 0.075 | 0.167 | 5.63671E-55 |
| Rftn2         | 4.18082E-59 | 0.273717811  | 0.149 | 0.116 | 6.97361E-55 |
| Nme4          | 1.20423E-58 | 0.281864794  | 0.149 | 0.108 | 2.00865E-54 |
| Apbb1         | 1.56146E-58 | -0.347605956 | 0.095 | 0.191 | 2.60451E-54 |
| Gria4         | 2.3491E-58  | -0.321038559 | 0.061 | 0.143 | 3.9183E-54  |
| Nsg1          | 2.43E-58    | -0.261012068 | 0.207 | 0.31  | 4.05324E-54 |
| Pcdha2        | 3.46826E-58 | -0.343321304 | 0.055 | 0.136 | 5.78506E-54 |
| Malat1        | 3.74694E-58 | -0.277828617 | 0.95  | 0.956 | 6.24989E-54 |
| Tshz2         | 4.78745E-58 | 0.268182148  | 0.35  | 0.311 | 7.98547E-54 |
| Serpinh1      | 1.5018E-57  | 0.299020643  | 0.168 | 0.099 | 2.50501E-53 |
| Dbn1          | 2.21393E-57 | -0.315014926 | 0.073 | 0.158 | 3.69284E-53 |

|           |             |              |       |       |             |
|-----------|-------------|--------------|-------|-------|-------------|
| Snord104  | 3.6845E-57  | 0.331386225  | 0.195 | 0.14  | 6.14575E-53 |
| Lhx1      | 4.6283E-57  | -0.280772422 | 0.402 | 0.524 | 7.72001E-53 |
| Glce      | 6.24702E-57 | -0.295026956 | 0.105 | 0.197 | 1.042E-52   |
| Ramp2     | 1.74693E-56 | 0.307515424  | 0.164 | 0.106 | 2.91389E-52 |
| Rrp15     | 2.41813E-56 | 0.266211868  | 0.201 | 0.166 | 4.03344E-52 |
| Hadh      | 4.06528E-55 | 0.295114434  | 0.107 | 0.064 | 6.78089E-51 |
| Sh3bp5    | 1.03047E-54 | -0.274721759 | 0.046 | 0.119 | 1.71882E-50 |
| Klf6      | 1.6261E-54  | -0.251184915 | 0.082 | 0.167 | 2.71233E-50 |
| Tspyl4    | 3.86884E-54 | -0.306522292 | 0.065 | 0.144 | 6.45322E-50 |
| Hist3h2a  | 9.33212E-54 | -0.321728066 | 0.076 | 0.163 | 1.5566E-49  |
| Arhgef7   | 6.52807E-53 | -0.277522943 | 0.085 | 0.167 | 1.08888E-48 |
| Akap12    | 1.44064E-52 | -0.359113371 | 0.05  | 0.129 | 2.40298E-48 |
| Hells     | 1.16584E-51 | 0.285457242  | 0.234 | 0.207 | 1.94462E-47 |
| Hist3h2ba | 1.21136E-51 | -0.294437818 | 0.072 | 0.156 | 2.02056E-47 |
| Hmgcs1    | 1.37125E-51 | -0.305822276 | 0.087 | 0.17  | 2.28724E-47 |
| Pdzrn3    | 2.45012E-51 | -0.412444817 | 0.079 | 0.167 | 4.0868E-47  |
| Lima1     | 5.01936E-51 | 0.299619944  | 0.155 | 0.112 | 8.37228E-47 |
| Nek7      | 6.08429E-51 | 0.267709249  | 0.144 | 0.108 | 1.01486E-46 |
| Ptprg     | 5.03368E-50 | 0.25772841   | 0.163 | 0.136 | 8.39618E-46 |
| Tnrc6c    | 8.01556E-50 | -0.250652858 | 0.112 | 0.197 | 1.337E-45   |
| Myod1     | 1.04456E-49 | -0.276086479 | 0.08  | 0.159 | 1.74233E-45 |
| Thsd7a    | 1.45148E-49 | -0.269393358 | 0.067 | 0.144 | 2.42107E-45 |
| Igdcc4    | 1.91912E-49 | 0.276241004  | 0.121 | 0.086 | 3.20108E-45 |
| Hddc2     | 3.31988E-49 | 0.274414723  | 0.122 | 0.084 | 5.53755E-45 |
| Cplx1     | 3.91826E-49 | -0.285702982 | 0.077 | 0.156 | 6.53566E-45 |
| Smoc1     | 7.31246E-49 | 0.252757742  | 0.155 | 0.128 | 1.21972E-44 |
| Gpatch4   | 1.35901E-48 | 0.266204822  | 0.212 | 0.17  | 2.26683E-44 |
| Epb4.1l1  | 3.07723E-48 | -0.342605451 | 0.039 | 0.106 | 5.13283E-44 |
| Pak7      | 3.97538E-48 | -0.278825913 | 0.049 | 0.12  | 6.63093E-44 |
| Adamts1   | 1.85798E-47 | 0.269308839  | 0.169 | 0.15  | 3.09911E-43 |
| Lrpap1    | 4.32168E-47 | -0.260956306 | 0.061 | 0.133 | 7.20857E-43 |
| Kcnip3    | 1.30452E-46 | -0.268106139 | 0.062 | 0.137 | 2.17594E-42 |
| Plp1      | 2.2539E-46  | -0.701696178 | 0.1   | 0.118 | 3.7595E-42  |
| Ifitm2    | 7.30504E-46 | 0.2590106    | 0.146 | 0.104 | 1.21848E-41 |
| Nexn      | 1.43462E-45 | 0.395268752  | 0.113 | 0.065 | 2.39295E-41 |
| Grina     | 2.30184E-45 | -0.298034856 | 0.053 | 0.125 | 3.83948E-41 |
| Tmpo      | 3.3466E-45  | -0.25831542  | 0.367 | 0.476 | 5.58212E-41 |
| Snhg4     | 6.99546E-45 | 0.270848366  | 0.123 | 0.079 | 1.16684E-40 |
| Kidins220 | 1.18777E-44 | -0.261191825 | 0.08  | 0.157 | 1.9812E-40  |
| Gm11223   | 4.34462E-44 | -0.344074942 | 0.156 | 0.229 | 7.24683E-40 |
| Gas6      | 1.01483E-43 | 0.324513192  | 0.121 | 0.069 | 1.69274E-39 |
| Sobp      | 8.94806E-43 | -0.251486171 | 0.071 | 0.144 | 1.49254E-38 |
| Rab13     | 9.52715E-42 | 0.26804961   | 0.113 | 0.075 | 1.58913E-37 |
| Grik2     | 4.27987E-41 | -0.276994822 | 0.052 | 0.116 | 7.13883E-37 |
| Nrxn2     | 6.48877E-41 | -0.272614672 | 0.042 | 0.103 | 1.08233E-36 |
| S100a16   | 9.10018E-41 | -0.342359813 | 0.046 | 0.109 | 1.51791E-36 |
| Add3      | 5.56102E-40 | -0.252662718 | 0.055 | 0.118 | 9.27579E-36 |
| Nes       | 9.39883E-40 | 0.323361237  | 0.122 | 0.076 | 1.56772E-35 |

|        |             |             |       |       |             |
|--------|-------------|-------------|-------|-------|-------------|
| Wdr60  | 1.19301E-36 | 0.283278637 | 0.148 | 0.11  | 1.98994E-32 |
| Ppfia2 | 1.41645E-36 | -0.27155335 | 0.062 | 0.126 | 2.36264E-32 |
| Fos    | 5.46633E-29 | 0.289556147 | 0.341 | 0.293 | 9.11783E-25 |
| Dusp5  | 2.95671E-28 | 0.253159518 | 0.111 | 0.081 | 4.9318E-24  |
| Xist   | 4.25717E-19 | 0.268066758 | 0.351 | 0.284 | 7.10095E-15 |
