# Supplementary material for: scRNA-seq in medulloblastoma shows cellular heterogeneity and lineage expansion support resistance to SHH inhibitor therapy
Source: PubMed Central journal article supplement (PMC6925218; doi:10.1038/s41467-019-13657-6), 2019-12-20
Supplement: 41467_2019_13657_MOESM11_ESM.pdf [file 41467_2019_13657_MOESM11_ESM.pdf]

|           | p_val    | avg_logFC | pct.Vismo_ | pct.Veh_Nc | p_val_adj |
|-----------|----------|-----------|------------|------------|-----------|
| Top2a     | 0        | 2.096832  | 0.881      | 0.249      | 0         |
| Cenpf     | 0        | 1.893585  | 0.774      | 0.18       | 0         |
| Mki67     | 0        | 1.844122  | 0.853      | 0.21       | 0         |
| Ube2c     | 0        | 1.701852  | 0.586      | 0.089      | 0         |
| Prc1      | 0        | 1.689608  | 0.594      | 0.077      | 0         |
| Tpx2      | 0        | 1.630632  | 0.669      | 0.085      | 0         |
| Cenpe     | 0        | 1.563214  | 0.654      | 0.135      | 0         |
| Spc25     | 0        | 1.482867  | 0.553      | 0.056      | 0         |
| Hmgb2     | 0        | 1.463203  | 0.812      | 0.25       | 0         |
| Nusap1    | 0        | 1.452931  | 0.528      | 0.052      | 0         |
| Smc4      | 0        | 1.431319  | 0.914      | 0.452      | 0         |
| Cdca8     | 0        | 1.427112  | 0.629      | 0.091      | 0         |
| Birc5     | 0        | 1.41048   | 0.626      | 0.087      | 0         |
| Kif23     | 0        | 1.394968  | 0.511      | 0.051      | 0         |
| Incenp    | 0        | 1.380446  | 0.624      | 0.111      | 0         |
| Cenpa     | 0        | 1.351657  | 0.498      | 0.09       | 0         |
| Hmmr      | 0        | 1.341213  | 0.432      | 0.034      | 0         |
| Ckap2l    | 0        | 1.276544  | 0.487      | 0.053      | 0         |
| Ccna2     | 0        | 1.263635  | 0.555      | 0.072      | 0         |
| Kif11     | 0        | 1.263456  | 0.502      | 0.056      | 0         |
| Cdc20     | 0        | 1.257126  | 0.431      | 0.056      | 0         |
| RP23-45G1 | 0        | 1.253883  | 0.696      | 0.189      | 0         |
| Cdk1      | 0        | 1.229088  | 0.509      | 0.077      | 0         |
| H2afx     | 0        | 1.205755  | 0.618      | 0.176      | 0         |
| Kif15     | 0        | 1.19237   | 0.491      | 0.059      | 0         |
| Pbk       | 0        | 1.144159  | 0.5        | 0.076      | 0         |
| 2810417H  | 0        | 1.13713   | 0.761      | 0.267      | 0         |
| Tacc3     | 0        | 1.135167  | 0.494      | 0.072      | 0         |
| Cdca3     | 0        | 1.131043  | 0.492      | 0.065      | 0         |
| Arhgap11a | 0        | 1.112936  | 0.412      | 0.051      | 0         |
| Arl6ip1   | 0        | 1.079468  | 0.697      | 0.388      | 0         |
| Sgol2     | 0        | 1.076652  | 0.372      | 0.041      | 0         |
| Ccnb1     | 0        | 1.05952   | 0.347      | 0.021      | 0         |
| Rps3a3    | 0        | 1.043953  | 0.335      | 0.024      | 0         |
| Rangap1   | 0        | 1.025322  | 0.545      | 0.127      | 0         |
| Mns1      | 0        | 1.018056  | 0.517      | 0.111      | 0         |
| Lmnb1     | 0        | 0.944209  | 0.64       | 0.211      | 0         |
| Smc2      | 0        | 0.90764   | 0.865      | 0.478      | 0         |
| Dek       | 0        | 0.73661   | 0.933      | 0.676      | 0         |
| Casc5     | 0        | 0.994632  | 0.415      | 0.061      | 0         |
| Kif20b    | 0        | 1.112887  | 0.44       | 0.076      | 0         |
| Mis18bp1  | 0        | 0.979993  | 0.371      | 0.043      | 0         |
| Ncapg     | 0        | 0.959381  | 0.409      | 0.062      | 0         |
| Esco2     | 3.9E-307 | 0.970344  | 0.408      | 0.063      | 6.5E-303  |
| Nuf2      | 5.1E-307 | 0.915352  | 0.343      | 0.036      | 8.6E-303  |
| Nucks1    | 1.2E-305 | 0.758037  | 0.867      | 0.591      | 1.9E-301  |
| Kif22     | 7.6E-305 | 0.889678  | 0.372      | 0.048      | 1.3E-300  |

|          |          |          |       |       |          |
|----------|----------|----------|-------|-------|----------|
| Spc24    | 1.3E-304 | 0.930405 | 0.513 | 0.123 | 2.1E-300 |
| Racgap1  | 1.3E-303 | 0.921473 | 0.522 | 0.131 | 2.2E-299 |
| H1fx     | 1.3E-303 | 0.982209 | 0.558 | 0.162 | 2.2E-299 |
| Aspm     | 1.2E-301 | 1.017828 | 0.333 | 0.035 | 2E-297   |
| Bub1     | 3.2E-290 | 0.867546 | 0.319 | 0.031 | 5.4E-286 |
| Nasp     | 8E-290   | 0.706296 | 0.904 | 0.629 | 1.3E-285 |
| Ccnb2    | 2.9E-282 | 0.920581 | 0.381 | 0.06  | 4.9E-278 |
| Knstrn   | 2.6E-280 | 0.925691 | 0.408 | 0.074 | 4.4E-276 |
| Sgol1    | 1.6E-277 | 0.899715 | 0.342 | 0.044 | 2.7E-273 |
| Mxd3     | 3.6E-276 | 0.813072 | 0.313 | 0.032 | 5.9E-272 |
| Anp32e   | 6.7E-275 | 0.723496 | 0.848 | 0.573 | 1.1E-270 |
| Anp32b   | 4E-273   | 0.682858 | 0.897 | 0.61  | 6.7E-269 |
| Fam64a   | 1.2E-272 | 0.811687 | 0.267 | 0.018 | 1.9E-268 |
| Ndc80    | 2.9E-267 | 0.78581  | 0.284 | 0.024 | 4.9E-263 |
| Bub1b    | 1.6E-265 | 0.74286  | 0.279 | 0.023 | 2.6E-261 |
| Ckap2    | 9.1E-263 | 0.867613 | 0.366 | 0.06  | 1.5E-258 |
| Cdca2    | 3.2E-261 | 0.756175 | 0.294 | 0.029 | 5.3E-257 |
| Kif4     | 3.9E-255 | 0.797023 | 0.285 | 0.028 | 6.6E-251 |
| C330027C | 5.4E-253 | 0.834923 | 0.337 | 0.049 | 9E-249   |
| Ect2     | 3.1E-248 | 0.757209 | 0.27  | 0.024 | 5.1E-244 |
| Ckap5    | 2.2E-247 | 0.915176 | 0.479 | 0.135 | 3.7E-243 |
| Plk1     | 9E-244   | 0.686163 | 0.227 | 0.012 | 1.5E-239 |
| Fbxo5    | 4.1E-241 | 0.8016   | 0.359 | 0.065 | 6.8E-237 |
| Aurkb    | 2.7E-235 | 0.730627 | 0.301 | 0.04  | 4.5E-231 |
| Ncapd2   | 2.7E-234 | 0.765558 | 0.399 | 0.092 | 4.6E-230 |
| Tmpo     | 1.1E-233 | 0.733444 | 0.738 | 0.383 | 1.8E-229 |
| Dbf4     | 1.1E-232 | 0.76904  | 0.338 | 0.057 | 1.8E-228 |
| Rrm2     | 4.4E-226 | 0.767846 | 0.463 | 0.133 | 7.4E-222 |
| Gm10075  | 5.5E-223 | 0.660353 | 0.804 | 0.483 | 9.2E-219 |
| Kif2c    | 5.2E-221 | 0.664772 | 0.241 | 0.022 | 8.6E-217 |
| Tuba1b   | 2.2E-220 | 0.748737 | 0.717 | 0.416 | 3.7E-216 |
| Dlgap5   | 7.6E-217 | 0.716154 | 0.254 | 0.027 | 1.3E-212 |
| Myod1    | 2.7E-214 | 0.821603 | 0.381 | 0.09  | 4.5E-210 |
| Rad21    | 5.4E-209 | 0.740619 | 0.674 | 0.336 | 8.9E-205 |
| Hnrnpu   | 8.3E-208 | 0.420587 | 0.97  | 0.876 | 1.4E-203 |
| Aurka    | 2.8E-207 | 0.634736 | 0.233 | 0.022 | 4.7E-203 |
| Kif20a   | 4.5E-206 | 0.561231 | 0.212 | 0.015 | 7.6E-202 |
| Melk     | 1.1E-202 | 0.611007 | 0.251 | 0.03  | 1.9E-198 |
| Spag5    | 2.4E-200 | 0.602384 | 0.21  | 0.016 | 4.1E-196 |
| Ttk      | 4.9E-198 | 0.596823 | 0.228 | 0.023 | 8.2E-194 |
| Diap3    | 3.8E-195 | 0.66604  | 0.272 | 0.041 | 6.4E-191 |
| Ska1     | 1.7E-193 | 0.586851 | 0.217 | 0.02  | 2.8E-189 |
| Anln     | 1.1E-192 | 0.622573 | 0.234 | 0.026 | 1.8E-188 |
| Ccnd2    | 4.9E-189 | 0.53492  | 0.925 | 0.723 | 8.2E-185 |
| Cep55    | 1.3E-188 | 0.573723 | 0.205 | 0.017 | 2.2E-184 |
| Prr11    | 1.6E-188 | 0.500139 | 0.18  | 0.01  | 2.7E-184 |
| Trim59   | 6.2E-187 | 0.701633 | 0.357 | 0.088 | 1E-182   |
| Tubb5    | 1.8E-181 | 0.434601 | 0.963 | 0.881 | 3E-177   |

|           |          |          |       |       |          |
|-----------|----------|----------|-------|-------|----------|
| Gas2l3    | 7.5E-181 | 0.596699 | 0.186 | 0.013 | 1.2E-176 |
| Cks2      | 8.6E-178 | 0.531468 | 0.199 | 0.018 | 1.4E-173 |
| Insm1     | 2.4E-174 | 0.614307 | 0.579 | 0.266 | 4.1E-170 |
| Tubb4b    | 2.5E-174 | 0.668516 | 0.437 | 0.152 | 4.1E-170 |
| Kifc1     | 1.9E-173 | 0.465789 | 0.17  | 0.01  | 3.2E-169 |
| Ran       | 2E-173   | 0.647851 | 0.676 | 0.371 | 3.3E-169 |
| Gm11223   | 3.5E-171 | 0.68486  | 0.471 | 0.179 | 5.9E-167 |
| Hirip3    | 1.2E-168 | 0.64428  | 0.65  | 0.332 | 2.1E-164 |
| Rad51ap1  | 9.8E-168 | 0.586596 | 0.356 | 0.102 | 1.6E-163 |
| Cdkn2d    | 1.2E-167 | 0.605122 | 0.268 | 0.052 | 2E-163   |
| Usp1      | 1.6E-167 | 0.612409 | 0.609 | 0.29  | 2.7E-163 |
| Neurod1   | 1.8E-165 | 0.662263 | 0.664 | 0.347 | 2.9E-161 |
| Sapcd2    | 4E-165   | 0.489773 | 0.164 | 0.01  | 6.7E-161 |
| Hmgn5     | 9.5E-165 | 0.632845 | 0.715 | 0.412 | 1.6E-160 |
| Lbr       | 1.7E-160 | 0.606083 | 0.407 | 0.14  | 2.8E-156 |
| Pif1      | 3E-160   | 0.487839 | 0.158 | 0.01  | 5E-156   |
| D17H6S56l | 5E-160   | 0.564582 | 0.269 | 0.055 | 8.3E-156 |
| Pmf1      | 4.3E-159 | 0.590624 | 0.34  | 0.096 | 7.2E-155 |
| Cenpm     | 5.1E-159 | 0.5505   | 0.348 | 0.102 | 8.4E-155 |
| Nek2      | 1.9E-158 | 0.467652 | 0.165 | 0.012 | 3.2E-154 |
| Espl1     | 1.4E-157 | 0.531137 | 0.183 | 0.017 | 2.3E-153 |
| Ska2      | 6.3E-154 | 0.633653 | 0.371 | 0.118 | 1.1E-149 |
| Nt5dc2    | 3.8E-153 | 0.582414 | 0.478 | 0.196 | 6.3E-149 |
| Plxnb2    | 8E-153   | 0.529274 | 0.414 | 0.156 | 1.3E-148 |
| Kif14     | 5.5E-152 | 0.461697 | 0.147 | 0.008 | 9.2E-148 |
| Psrc1     | 4E-151   | 0.502674 | 0.174 | 0.017 | 6.6E-147 |
| Shcbp1    | 6.5E-151 | 0.557152 | 0.194 | 0.024 | 1.1E-146 |
| Ttr       | 7.6E-150 | 0.803784 | 0.225 | 0.039 | 1.3E-145 |
| Ccdc34    | 1.1E-149 | 0.548554 | 0.643 | 0.337 | 1.8E-145 |
| Foxm1     | 5.4E-149 | 0.522274 | 0.158 | 0.012 | 9E-145   |
| Mad2l1    | 6.5E-149 | 0.506365 | 0.254 | 0.055 | 1.1E-144 |
| Tuba1c    | 1.1E-148 | 0.580864 | 0.154 | 0.011 | 1.8E-144 |
| Zfp704    | 2.8E-148 | 0.514366 | 0.49  | 0.212 | 4.7E-144 |
| Ankle1    | 4.7E-147 | 0.473096 | 0.148 | 0.009 | 7.8E-143 |
| 2700094K: | 3.3E-145 | 0.518739 | 0.817 | 0.573 | 5.6E-141 |
| Cdc25c    | 9.8E-144 | 0.47739  | 0.162 | 0.015 | 1.6E-139 |
| Xpo1      | 2.1E-143 | 0.540281 | 0.464 | 0.2   | 3.6E-139 |
| Erdr1     | 4.1E-142 | 0.648238 | 0.414 | 0.168 | 6.8E-138 |
| Hnrnpa2b1 | 4.6E-141 | 0.342009 | 0.972 | 0.925 | 7.7E-137 |
| Whsc1     | 4.3E-140 | 0.553454 | 0.673 | 0.382 | 7.3E-136 |
| 2700099C: | 7.5E-139 | 0.478296 | 0.191 | 0.028 | 1.3E-134 |
| Cenpl     | 1E-138   | 0.414457 | 0.159 | 0.016 | 1.7E-134 |
| Nde1      | 1.4E-138 | 0.549538 | 0.269 | 0.067 | 2.3E-134 |
| Hdgf      | 4.2E-138 | 0.533215 | 0.77  | 0.521 | 7E-134   |
| Tyms      | 1.1E-137 | 0.579728 | 0.427 | 0.173 | 1.8E-133 |
| Hmgn1     | 1.8E-136 | 0.472761 | 0.828 | 0.631 | 3.1E-132 |
| Bora      | 2.1E-136 | 0.55484  | 0.208 | 0.036 | 3.5E-132 |
| Ccdc18    | 1.3E-135 | 0.661813 | 0.27  | 0.066 | 2.2E-131 |

|           |          |          |       |       |          |
|-----------|----------|----------|-------|-------|----------|
| Rrm1      | 4.5E-135 | 0.513504 | 0.462 | 0.201 | 7.4E-131 |
| Troap     | 3.6E-134 | 0.414952 | 0.146 | 0.012 | 5.9E-130 |
| Cdk5rap2  | 3.6E-133 | 0.512599 | 0.345 | 0.119 | 6E-129   |
| Spdl1     | 4E-132   | 0.482225 | 0.175 | 0.023 | 6.7E-128 |
| Cdca5     | 4.3E-131 | 0.454041 | 0.175 | 0.023 | 7.1E-127 |
| Hjurp     | 5.1E-131 | 0.591369 | 0.655 | 0.387 | 8.5E-127 |
| Cenpk     | 1.7E-130 | 0.578098 | 0.317 | 0.098 | 2.9E-126 |
| Cmc2      | 3.1E-129 | 0.470516 | 0.262 | 0.07  | 5.2E-125 |
| G2e3      | 9.5E-129 | 0.494287 | 0.259 | 0.068 | 1.6E-124 |
| Pkp4      | 9.8E-129 | 0.536259 | 0.239 | 0.055 | 1.6E-124 |
| Purb      | 1.9E-128 | 0.484199 | 0.778 | 0.519 | 3.1E-124 |
| Neil3     | 6.2E-128 | 0.405119 | 0.172 | 0.024 | 1E-123   |
| Cit       | 7.6E-128 | 0.452191 | 0.169 | 0.024 | 1.3E-123 |
| Hmgb1     | 1.2E-127 | 0.564903 | 0.598 | 0.326 | 2E-123   |
| H2afz     | 1.4E-127 | 0.495035 | 0.416 | 0.171 | 2.3E-123 |
| Kif18a    | 1.1E-126 | 0.408783 | 0.155 | 0.019 | 1.9E-122 |
| Trim37    | 1.3E-126 | 0.502302 | 0.432 | 0.184 | 2.2E-122 |
| Ccnf      | 8.2E-126 | 0.369982 | 0.133 | 0.011 | 1.4E-121 |
| Rtkn2     | 1.4E-125 | 0.399419 | 0.135 | 0.01  | 2.4E-121 |
| Cenph     | 5.8E-125 | 0.502527 | 0.353 | 0.128 | 9.7E-121 |
| Ptn       | 1.9E-123 | 0.554457 | 0.579 | 0.304 | 3.2E-119 |
| Fxyd6     | 3.5E-123 | 0.564222 | 0.647 | 0.381 | 5.8E-119 |
| Cenpw     | 1.2E-122 | 0.422866 | 0.258 | 0.074 | 2E-118   |
| Selm      | 2.6E-121 | 0.482575 | 0.458 | 0.211 | 4.4E-117 |
| Hist1h2ak | 6.1E-121 | 0.714794 | 0.241 | 0.06  | 1E-116   |
| Mthfd2    | 2.2E-120 | 0.533811 | 0.235 | 0.058 | 3.6E-116 |
| Stmn1     | 2.5E-120 | 0.465151 | 0.45  | 0.205 | 4.2E-116 |
| Sae1      | 3.3E-120 | 0.466914 | 0.487 | 0.237 | 5.6E-116 |
| Ptma      | 4.1E-120 | 0.453015 | 0.808 | 0.588 | 6.9E-116 |
| H2afv     | 6.1E-120 | 0.393674 | 0.887 | 0.735 | 1E-115   |
| Cdkn2c    | 1.4E-119 | 0.442284 | 0.27  | 0.08  | 2.3E-115 |
| Plk4      | 1.4E-119 | 0.451531 | 0.239 | 0.062 | 2.4E-115 |
| Psmc1     | 1E-118   | 0.470895 | 0.646 | 0.381 | 1.7E-114 |
| Gpc1      | 2.6E-117 | 0.506684 | 0.268 | 0.081 | 4.3E-113 |
| Clspn     | 5.7E-117 | 0.536134 | 0.366 | 0.146 | 9.5E-113 |
| Cenpq     | 1.2E-116 | 0.476087 | 0.28  | 0.087 | 2E-112   |
| Ptms      | 2.5E-116 | 0.470999 | 0.652 | 0.409 | 4.1E-112 |
| Psip1     | 6.4E-116 | 0.433    | 0.854 | 0.656 | 1.1E-111 |
| Suz12     | 1.5E-114 | 0.420649 | 0.391 | 0.171 | 2.5E-110 |
| Tk1       | 1.5E-113 | 0.437936 | 0.239 | 0.065 | 2.4E-109 |
| Map1b     | 2.1E-113 | 0.500286 | 0.709 | 0.469 | 3.5E-109 |
| Lmnb2     | 2.5E-111 | 0.451868 | 0.301 | 0.106 | 4.1E-107 |
| Ybx3      | 9.3E-110 | 0.437932 | 0.54  | 0.295 | 1.5E-105 |
| Dut       | 1.1E-109 | 0.428615 | 0.683 | 0.42  | 1.9E-105 |
| Smc6      | 4.8E-109 | 0.458101 | 0.626 | 0.37  | 8E-105   |
| Ezh2      | 1.7E-108 | 0.466104 | 0.784 | 0.563 | 2.9E-104 |
| Zic5      | 1.6E-107 | 0.40241  | 0.346 | 0.142 | 2.6E-103 |
| Cenpn     | 5.1E-107 | 0.38466  | 0.167 | 0.03  | 8.6E-103 |

|          |          |          |       |       |          |
|----------|----------|----------|-------|-------|----------|
| Ndc1     | 6.4E-107 | 0.425539 | 0.216 | 0.056 | 1.1E-102 |
| Hnrnpd   | 4.1E-106 | 0.416463 | 0.817 | 0.605 | 6.9E-102 |
| Drap1    | 1.2E-105 | 0.4424   | 0.489 | 0.255 | 2E-101   |
| Gm9800   | 1.5E-104 | 0.455386 | 0.752 | 0.528 | 2.6E-100 |
| Kpnb1    | 2.5E-104 | 0.428501 | 0.507 | 0.276 | 4.2E-100 |
| Ncaph    | 5.8E-104 | 0.424435 | 0.227 | 0.064 | 9.7E-100 |
| Odf2     | 7.8E-104 | 0.409387 | 0.28  | 0.099 | 1.3E-99  |
| Srsf1    | 1.7E-103 | 0.421884 | 0.52  | 0.286 | 2.8E-99  |
| Eif2s2   | 5.4E-103 | 0.450264 | 0.559 | 0.312 | 9E-99    |
| Neur11b  | 1E-102   | 0.361529 | 0.108 | 0.007 | 1.73E-98 |
| Hnrnpa0  | 1.3E-102 | 0.339451 | 0.694 | 0.453 | 2.13E-98 |
| Nudc     | 1.8E-102 | 0.439195 | 0.492 | 0.258 | 3.04E-98 |
| Sptbn1   | 1.5E-101 | 0.433949 | 0.457 | 0.233 | 2.43E-97 |
| Ppp1r14c | 2.5E-101 | 0.365436 | 0.332 | 0.139 | 4.15E-97 |
| Pttg1    | 7.3E-101 | 0.488978 | 0.267 | 0.092 | 1.22E-96 |
| Cenpp    | 1.9E-100 | 0.394734 | 0.21  | 0.056 | 3.09E-96 |
| Cks1b    | 8.1E-100 | 0.46225  | 0.515 | 0.277 | 1.35E-95 |
| Ncapg2   | 8.7E-100 | 0.382898 | 0.193 | 0.048 | 1.45E-95 |
| Trim28   | 1.6E-99  | 0.327404 | 0.562 | 0.343 | 2.67E-95 |
| Rfc1     | 2.7E-99  | 0.431533 | 0.569 | 0.331 | 4.46E-95 |
| Alyref   | 4.2E-99  | 0.352884 | 0.374 | 0.178 | 6.93E-95 |
| mt-Rnr1  | 4.5E-99  | 0.388761 | 0.594 | 0.352 | 7.56E-95 |
| Vps36    | 1.1E-98  | 0.360338 | 0.47  | 0.251 | 1.83E-94 |
| Ncaph2   | 1.25E-98 | 0.325886 | 0.309 | 0.13  | 2.09E-94 |
| Mdc1     | 1.41E-98 | 0.464886 | 0.227 | 0.066 | 2.35E-94 |
| Lyar     | 2.45E-98 | 0.39543  | 0.503 | 0.276 | 4.09E-94 |
| Cenpc1   | 2.03E-97 | 0.429904 | 0.27  | 0.095 | 3.38E-93 |
| Cenpj    | 6.96E-97 | 0.366171 | 0.268 | 0.098 | 1.16E-92 |
| Elavl2   | 2.42E-96 | 0.402493 | 0.442 | 0.229 | 4.04E-92 |
| Ska3     | 2.72E-96 | 0.320906 | 0.148 | 0.027 | 4.54E-92 |
| Ywhaz    | 6.07E-96 | 0.344956 | 0.548 | 0.325 | 1.01E-91 |
| Cep89    | 1.09E-95 | 0.485342 | 0.183 | 0.041 | 1.82E-91 |
| Naa50    | 1.41E-94 | 0.407762 | 0.49  | 0.271 | 2.35E-90 |
| Set      | 2.45E-94 | 0.393103 | 0.627 | 0.397 | 4.09E-90 |
| Ubald2   | 3.49E-94 | 0.435629 | 0.202 | 0.055 | 5.83E-90 |
| Gtse1    | 4.71E-94 | 0.305886 | 0.104 | 0.009 | 7.86E-90 |
| Uhrf1    | 1.87E-93 | 0.323689 | 0.313 | 0.14  | 3.12E-89 |
| Hmgb3    | 1.88E-93 | 0.415033 | 0.488 | 0.261 | 3.14E-89 |
| Atp5k    | 2.4E-93  | 0.39188  | 0.667 | 0.441 | 4E-89    |
| Ccdc25   | 2.45E-93 | 0.41278  | 0.335 | 0.145 | 4.09E-89 |
| Fzr1     | 2.91E-93 | 0.401954 | 0.235 | 0.078 | 4.86E-89 |
| Sept11   | 3.04E-93 | 0.367522 | 0.467 | 0.248 | 5.06E-89 |
| Larp7    | 3.5E-93  | 0.411797 | 0.522 | 0.291 | 5.84E-89 |
| Ehd1     | 4.98E-93 | 0.385471 | 0.241 | 0.085 | 8.31E-89 |
| Lsm2     | 9.44E-93 | 0.333486 | 0.39  | 0.198 | 1.57E-88 |
| Cited1   | 1.52E-92 | 0.404857 | 0.178 | 0.042 | 2.54E-88 |
| Ccng2    | 2.53E-92 | 0.338567 | 0.267 | 0.106 | 4.22E-88 |
| Clic4    | 3.72E-92 | 0.379264 | 0.388 | 0.187 | 6.2E-88  |

|          |          |          |       |       |          |
|----------|----------|----------|-------|-------|----------|
| Asf1b    | 3.92E-92 | 0.373789 | 0.156 | 0.03  | 6.54E-88 |
| Gsg2     | 7.93E-92 | 0.324592 | 0.128 | 0.018 | 1.32E-87 |
| Pknox1   | 8.31E-92 | 0.352722 | 0.254 | 0.092 | 1.39E-87 |
| Dnmt1    | 1.11E-91 | 0.380743 | 0.455 | 0.243 | 1.86E-87 |
| Fkbp2    | 1.74E-91 | 0.368834 | 0.489 | 0.274 | 2.9E-87  |
| Hnrnpul1 | 1.93E-91 | 0.317553 | 0.319 | 0.142 | 3.21E-87 |
| Plp1     | 2.3E-91  | 0.424842 | 0.278 | 0.107 | 3.84E-87 |
| Lsm6     | 3.21E-91 | 0.352035 | 0.58  | 0.355 | 5.35E-87 |
| Smarcd3  | 1.07E-90 | 0.419874 | 0.196 | 0.054 | 1.78E-86 |
| Nfyb     | 1.5E-90  | 0.359918 | 0.356 | 0.171 | 2.5E-86  |
| E2f8     | 1.74E-90 | 0.336025 | 0.107 | 0.01  | 2.89E-86 |
| Bub3     | 2.73E-90 | 0.447635 | 0.461 | 0.246 | 4.55E-86 |
| Cdk11b   | 7.17E-90 | 0.393108 | 0.716 | 0.484 | 1.2E-85  |
| Brd9     | 1.11E-89 | 0.309074 | 0.349 | 0.171 | 1.86E-85 |
| Atad2    | 1.41E-89 | 0.447059 | 0.344 | 0.152 | 2.36E-85 |
| Cdca4    | 1.69E-89 | 0.278735 | 0.197 | 0.064 | 2.82E-85 |
| Ppp2r2c  | 1.75E-89 | 0.332399 | 0.733 | 0.503 | 2.92E-85 |
| Rnf187   | 2.11E-89 | 0.37878  | 0.603 | 0.382 | 3.52E-85 |
| Hnrnpl   | 3.63E-89 | 0.324447 | 0.581 | 0.36  | 6.06E-85 |
| Hsp90aa1 | 3.65E-89 | 0.393662 | 0.777 | 0.567 | 6.09E-85 |
| Sephs1   | 4.67E-89 | 0.381334 | 0.264 | 0.104 | 7.79E-85 |
| Ctcf     | 2.78E-88 | 0.392034 | 0.673 | 0.436 | 4.64E-84 |
| Dnajc9   | 3.54E-88 | 0.387609 | 0.545 | 0.316 | 5.91E-84 |
| Hnrnpul2 | 7.14E-88 | 0.403113 | 0.422 | 0.219 | 1.19E-83 |
| Cep110   | 1.11E-87 | 0.453321 | 0.285 | 0.11  | 1.85E-83 |
| Azin1    | 1.11E-87 | 0.337288 | 0.328 | 0.154 | 1.85E-83 |
| Trip13   | 4.27E-87 | 0.361634 | 0.175 | 0.047 | 7.12E-83 |
| Peg3     | 9.98E-87 | 0.315076 | 0.442 | 0.243 | 1.67E-82 |
| Fen1     | 1.42E-86 | 0.334927 | 0.28  | 0.117 | 2.36E-82 |
| Stag1    | 2.98E-86 | 0.351696 | 0.341 | 0.161 | 4.97E-82 |
| Slc17a6  | 3.38E-86 | 0.259857 | 0.259 | 0.111 | 5.64E-82 |
| Ywhae    | 4.26E-86 | 0.345007 | 0.868 | 0.702 | 7.11E-82 |
| Rfc4     | 1.26E-85 | 0.336706 | 0.382 | 0.193 | 2.1E-81  |
| Phf17    | 2.54E-85 | 0.3609   | 0.19  | 0.054 | 4.23E-81 |
| Psm13    | 2.68E-85 | 0.275494 | 0.311 | 0.149 | 4.46E-81 |
| 5830418K | 3.29E-85 | 0.306623 | 0.289 | 0.13  | 5.48E-81 |
| Cbx3     | 4.34E-85 | 0.426019 | 0.451 | 0.243 | 7.24E-81 |
| U2af2    | 5.48E-85 | 0.350254 | 0.301 | 0.138 | 9.14E-81 |
| Nudcd2   | 8.76E-85 | 0.357181 | 0.359 | 0.177 | 1.46E-80 |
| Ank3     | 1.16E-84 | 0.309692 | 0.568 | 0.352 | 1.94E-80 |
| Otx2     | 1.64E-84 | 0.326407 | 0.374 | 0.187 | 2.73E-80 |
| Cul3     | 2.59E-84 | 0.358981 | 0.307 | 0.137 | 4.32E-80 |
| Pvalb    | 3.39E-84 | 0.435181 | 0.223 | 0.072 | 5.65E-80 |
| Ncl      | 6.28E-84 | 0.263668 | 0.973 | 0.921 | 1.05E-79 |
| Sap30    | 7.02E-84 | 0.281661 | 0.23  | 0.09  | 1.17E-79 |
| Neo1     | 1.21E-83 | 0.345857 | 0.251 | 0.1   | 2.01E-79 |
| Anapc11  | 9.89E-83 | 0.35692  | 0.491 | 0.283 | 1.65E-78 |
| Cux1     | 1.54E-82 | 0.355595 | 0.356 | 0.175 | 2.57E-78 |

|          |          |          |       |       |          |
|----------|----------|----------|-------|-------|----------|
| Hist1h1e | 1.72E-82 | 0.441094 | 0.152 | 0.036 | 2.87E-78 |
| Rbbp7    | 4.03E-82 | 0.319897 | 0.497 | 0.293 | 6.71E-78 |
| Dynll2   | 4.58E-82 | 0.312591 | 0.428 | 0.244 | 7.63E-78 |
| Wnk1     | 5.62E-82 | 0.269642 | 0.308 | 0.152 | 9.37E-78 |
| Hsph1    | 6.03E-82 | 0.319669 | 0.424 | 0.242 | 1.01E-77 |
| Ddah2    | 1.16E-81 | 0.376314 | 0.79  | 0.602 | 1.93E-77 |
| Itgb3bp  | 1.34E-81 | 0.333628 | 0.236 | 0.089 | 2.23E-77 |
| Ptges3   | 2.03E-81 | 0.303551 | 0.373 | 0.199 | 3.39E-77 |
| Mphosph9 | 2.34E-81 | 0.288584 | 0.274 | 0.12  | 3.9E-77  |
| Zcwpw1   | 2.42E-81 | 0.385611 | 0.224 | 0.078 | 4.03E-77 |
| Frmd4a   | 3.45E-81 | 0.272767 | 0.437 | 0.254 | 5.75E-77 |
| Blm      | 4.09E-81 | 0.35488  | 0.228 | 0.082 | 6.82E-77 |
| 2700029M | 4.65E-81 | 0.325803 | 0.454 | 0.261 | 7.76E-77 |
| BC005537 | 5.02E-81 | 0.264868 | 0.471 | 0.288 | 8.38E-77 |
| Cntlh    | 7.19E-81 | 0.327301 | 0.311 | 0.144 | 1.2E-76  |
| E2f2     | 7.27E-81 | 0.37026  | 0.154 | 0.035 | 1.21E-76 |
| Slc7a5   | 9.33E-81 | 0.280205 | 0.245 | 0.102 | 1.56E-76 |
| St18     | 1.06E-80 | 0.348983 | 0.235 | 0.088 | 1.77E-76 |
| Rad51    | 1.16E-80 | 0.350172 | 0.231 | 0.085 | 1.93E-76 |
| Nmt1     | 2.14E-80 | 0.325733 | 0.312 | 0.15  | 3.57E-76 |
| Gm26924  | 6.63E-80 | 0.307285 | 0.354 | 0.186 | 1.11E-75 |
| Gnb1     | 1.34E-79 | 0.265392 | 0.512 | 0.334 | 2.23E-75 |
| Gen1     | 2.33E-79 | 0.282049 | 0.107 | 0.014 | 3.88E-75 |
| Aars     | 3.06E-79 | 0.310575 | 0.291 | 0.133 | 5.1E-75  |
| Brd8     | 4.76E-79 | 0.370783 | 0.496 | 0.287 | 7.94E-75 |
| Prmt1    | 6.14E-78 | 0.265992 | 0.408 | 0.236 | 1.02E-73 |
| Klf6     | 1.15E-77 | 0.284204 | 0.223 | 0.086 | 1.92E-73 |
| Mprlp    | 1.77E-77 | 0.280582 | 0.282 | 0.13  | 2.95E-73 |
| Nhlh2    | 2.84E-77 | 0.298109 | 0.542 | 0.338 | 4.74E-73 |
| Ywhah    | 5.08E-77 | 0.30362  | 0.265 | 0.115 | 8.47E-73 |
| Rcc2     | 1.43E-76 | 0.299003 | 0.349 | 0.186 | 2.39E-72 |
| Hyls1    | 8.76E-76 | 0.322095 | 0.11  | 0.017 | 1.46E-71 |
| Cdc25b   | 1.34E-75 | 0.358804 | 0.167 | 0.047 | 2.23E-71 |
| Pum2     | 2.02E-75 | 0.26331  | 0.312 | 0.163 | 3.36E-71 |
| Sf1      | 2.15E-75 | 0.253007 | 0.376 | 0.221 | 3.59E-71 |
| Calm3    | 2.34E-75 | 0.342063 | 0.678 | 0.461 | 3.91E-71 |
| Gm10036  | 2.74E-75 | 0.304378 | 0.371 | 0.197 | 4.57E-71 |
| mt-Rnr2  | 5.39E-75 | 0.313034 | 0.998 | 0.996 | 9E-71    |
| Clic1    | 7.9E-75  | 0.273399 | 0.271 | 0.127 | 1.32E-70 |
| Podxl2   | 1.79E-74 | 0.278773 | 0.333 | 0.171 | 2.98E-70 |
| Gmnn     | 2.38E-74 | 0.329402 | 0.268 | 0.118 | 3.97E-70 |
| Dnajc21  | 4.84E-74 | 0.333082 | 0.366 | 0.192 | 8.07E-70 |
| Celf2    | 5.1E-74  | 0.313042 | 0.769 | 0.567 | 8.51E-70 |
| Naa15    | 7.75E-74 | 0.266473 | 0.588 | 0.394 | 1.29E-69 |
| Taf1     | 9.41E-74 | 0.267077 | 0.323 | 0.172 | 1.57E-69 |
| Pkdcc    | 1.11E-73 | 0.284422 | 0.151 | 0.042 | 1.86E-69 |
| Myh10    | 1.84E-73 | 0.279144 | 0.474 | 0.293 | 3.06E-69 |
| Smarca5  | 4.21E-73 | 0.335798 | 0.602 | 0.393 | 7.03E-69 |

|           |          |          |       |       |          |
|-----------|----------|----------|-------|-------|----------|
| Nsl1      | 9.35E-73 | 0.281191 | 0.125 | 0.025 | 1.56E-68 |
| Exosc8    | 1.15E-72 | 0.254543 | 0.335 | 0.178 | 1.92E-68 |
| Nrxn1     | 1.19E-72 | 0.327917 | 0.337 | 0.17  | 1.99E-68 |
| Rock2     | 1.7E-72  | 0.253038 | 0.334 | 0.181 | 2.83E-68 |
| Dnph1     | 1.79E-72 | 0.307914 | 0.243 | 0.104 | 2.98E-68 |
| Calm2     | 1.91E-72 | 0.318335 | 0.9   | 0.819 | 3.18E-68 |
| Mrfap1    | 3.11E-72 | 0.28094  | 0.588 | 0.407 | 5.19E-68 |
| E2f7      | 1.41E-71 | 0.300084 | 0.12  | 0.024 | 2.36E-67 |
| Taf5      | 1.91E-71 | 0.270521 | 0.163 | 0.051 | 3.18E-67 |
| Abcf1     | 2.26E-71 | 0.299348 | 0.644 | 0.445 | 3.78E-67 |
| Ppp2r2b   | 3.51E-71 | 0.303389 | 0.139 | 0.037 | 5.86E-67 |
| Syne2     | 5.95E-71 | 0.256812 | 0.344 | 0.189 | 9.92E-67 |
| Zc3h7a    | 7.75E-71 | 0.264445 | 0.293 | 0.151 | 1.29E-66 |
| Pcf11     | 1.52E-70 | 0.295446 | 0.298 | 0.15  | 2.53E-66 |
| Hdgfrp3   | 2.55E-70 | 0.254246 | 0.47  | 0.291 | 4.25E-66 |
| Fut9      | 4.6E-70  | 0.287    | 0.331 | 0.174 | 7.67E-66 |
| Syncrip   | 5.67E-70 | 0.348126 | 0.684 | 0.48  | 9.47E-66 |
| Hn1       | 5.79E-70 | 0.363761 | 0.63  | 0.425 | 9.66E-66 |
| Stil      | 1.36E-69 | 0.301278 | 0.12  | 0.023 | 2.27E-65 |
| G3bp1     | 1.97E-69 | 0.278236 | 0.51  | 0.332 | 3.28E-65 |
| Mis12     | 2.24E-69 | 0.288037 | 0.188 | 0.068 | 3.73E-65 |
| Suv39h2   | 6.5E-69  | 0.283524 | 0.241 | 0.107 | 1.08E-64 |
| Ccp110    | 7.78E-69 | 0.26921  | 0.368 | 0.21  | 1.3E-64  |
| Smchd1    | 1.01E-68 | 0.281306 | 0.412 | 0.242 | 1.68E-64 |
| Traip     | 1.01E-68 | 0.27973  | 0.11  | 0.021 | 1.69E-64 |
| Smarcc1   | 1.33E-68 | 0.328193 | 0.637 | 0.433 | 2.22E-64 |
| Tpm4      | 1.47E-68 | 0.305913 | 0.486 | 0.297 | 2.45E-64 |
| Rb1       | 2.48E-68 | 0.295418 | 0.176 | 0.059 | 4.14E-64 |
| Gap43     | 3.46E-68 | 0.398195 | 0.641 | 0.459 | 5.78E-64 |
| Cenpb     | 1.41E-67 | 0.283565 | 0.376 | 0.209 | 2.35E-63 |
| Miip      | 1.6E-67  | 0.274942 | 0.125 | 0.03  | 2.66E-63 |
| Smc1a     | 1.7E-67  | 0.363023 | 0.768 | 0.598 | 2.84E-63 |
| Ubtf      | 1.83E-67 | 0.262765 | 0.61  | 0.417 | 3.06E-63 |
| Iws1      | 3.92E-67 | 0.251632 | 0.343 | 0.191 | 6.54E-63 |
| Pbrm1     | 4.53E-67 | 0.305617 | 0.7   | 0.499 | 7.56E-63 |
| Mis18a    | 5.88E-67 | 0.288277 | 0.189 | 0.069 | 9.81E-63 |
| Ctps      | 6.61E-67 | 0.256271 | 0.272 | 0.136 | 1.1E-62  |
| Chaf1a    | 9.9E-67  | 0.283514 | 0.296 | 0.152 | 1.65E-62 |
| Gpsm2     | 1.18E-66 | 0.250859 | 0.12  | 0.029 | 1.97E-62 |
| Hmg20b    | 3.83E-66 | 0.256974 | 0.382 | 0.23  | 6.39E-62 |
| Mtss1     | 4.33E-66 | 0.25748  | 0.306 | 0.163 | 7.22E-62 |
| Tbcb      | 5.63E-66 | 0.265831 | 0.458 | 0.283 | 9.4E-62  |
| 281044212 | 7.39E-66 | 0.287687 | 0.127 | 0.03  | 1.23E-61 |
| Basp1     | 1.44E-65 | 0.3218   | 0.814 | 0.649 | 2.41E-61 |
| Hsp90b1   | 1.46E-65 | 0.365887 | 0.797 | 0.655 | 2.43E-61 |
| Zwilch    | 1.57E-65 | 0.272558 | 0.156 | 0.048 | 2.61E-61 |
| Ryk       | 2.09E-65 | 0.252739 | 0.275 | 0.142 | 3.48E-61 |
| Supt16    | 2.43E-65 | 0.335854 | 0.679 | 0.478 | 4.06E-61 |



|           |          |          |       |       |          |
|-----------|----------|----------|-------|-------|----------|
| Numa1     | 5.01E-65 | 0.269117 | 0.222 | 0.096 | 8.36E-61 |
| Zc3h15    | 5.41E-65 | 0.266147 | 0.534 | 0.351 | 9.02E-61 |
| Mgat5b    | 6.49E-65 | 0.318999 | 0.168 | 0.055 | 1.08E-60 |
| Sox11     | 7.37E-65 | 0.274143 | 0.204 | 0.089 | 1.23E-60 |
| Terf1     | 1.26E-64 | 0.270307 | 0.15  | 0.047 | 2.11E-60 |
| Arpp19    | 1.47E-64 | 0.266699 | 0.533 | 0.356 | 2.46E-60 |
| Mphosph8  | 1.61E-64 | 0.252633 | 0.517 | 0.339 | 2.68E-60 |
| Hmgn2     | 1.64E-64 | 0.319848 | 0.38  | 0.209 | 2.74E-60 |
| Rock1     | 1.89E-64 | 0.257943 | 0.469 | 0.302 | 3.16E-60 |
| Hist1h2ag | 1.46E-63 | 0.250323 | 0.115 | 0.025 | 2.43E-59 |
| Shf       | 1.48E-63 | 0.285766 | 0.118 | 0.028 | 2.48E-59 |
| Cse1l     | 1.51E-63 | 0.301731 | 0.215 | 0.091 | 2.52E-59 |
| Rpa1      | 1.6E-63  | 0.307812 | 0.231 | 0.103 | 2.66E-59 |
| Ppig      | 1.63E-63 | 0.257348 | 0.655 | 0.467 | 2.72E-59 |
| Mybl1     | 3.08E-63 | 0.262546 | 0.106 | 0.021 | 5.13E-59 |
| Rbbp8     | 6.97E-63 | 0.25335  | 0.228 | 0.105 | 1.16E-58 |
| Mdm1      | 8.93E-63 | 0.250198 | 0.141 | 0.042 | 1.49E-58 |
| Cdc42bpa  | 1.34E-62 | 0.258599 | 0.222 | 0.1   | 2.23E-58 |
| Zfp91     | 1.45E-62 | 0.259471 | 0.662 | 0.471 | 2.42E-58 |
| Oxct1     | 2.68E-62 | 0.281627 | 0.681 | 0.486 | 4.47E-58 |
| Cars      | 5.1E-62  | 0.33198  | 0.164 | 0.053 | 8.51E-58 |
| H2afy     | 9.47E-62 | 0.279471 | 0.782 | 0.6   | 1.58E-57 |
| Chst2     | 7.04E-61 | 0.286209 | 0.112 | 0.023 | 1.17E-56 |
| Phldb1    | 8.4E-61  | 0.25908  | 0.131 | 0.04  | 1.4E-56  |
| Ctnnb1    | 1.53E-60 | 0.252246 | 0.527 | 0.365 | 2.55E-56 |
| Prrc2a    | 1.67E-60 | 0.346561 | 0.162 | 0.051 | 2.78E-56 |
| Ccdc88a   | 3.23E-60 | 0.322125 | 0.616 | 0.429 | 5.38E-56 |
| Baz1b     | 8.89E-60 | 0.282081 | 0.664 | 0.482 | 1.48E-55 |
| Neto2     | 1.95E-59 | 0.299586 | 0.157 | 0.053 | 3.25E-55 |
| Pdap1     | 2.51E-59 | 0.281924 | 0.848 | 0.696 | 4.18E-55 |
| Eif5b     | 2.74E-59 | 0.277349 | 0.766 | 0.592 | 4.57E-55 |
| Ccdc77    | 5.5E-59  | 0.254679 | 0.143 | 0.047 | 9.17E-55 |
| Cadps2    | 8.85E-59 | 0.294174 | 0.112 | 0.027 | 1.48E-54 |
| Ttf2      | 2.81E-58 | 0.268728 | 0.113 | 0.026 | 4.69E-54 |
| Calm1     | 1.65E-57 | 0.255912 | 0.914 | 0.802 | 2.75E-53 |
| Cbx1      | 1.1E-56  | 0.297652 | 0.818 | 0.672 | 1.84E-52 |
| Metap2    | 2.19E-56 | 0.281437 | 0.772 | 0.604 | 3.65E-52 |
| Nup37     | 6.69E-56 | 0.27416  | 0.163 | 0.06  | 1.12E-51 |
| E2f1      | 1.11E-55 | 0.264475 | 0.304 | 0.168 | 1.85E-51 |
| C77370    | 5.29E-55 | 0.261971 | 0.171 | 0.067 | 8.82E-51 |
| Nup210    | 7.93E-55 | 0.279362 | 0.147 | 0.051 | 1.32E-50 |
| Ipo5      | 1.51E-54 | 0.257276 | 0.263 | 0.139 | 2.52E-50 |
| Ccne2     | 8.26E-54 | 0.35159  | 0.178 | 0.066 | 1.38E-49 |
| Nars      | 1.23E-53 | 0.306324 | 0.579 | 0.407 | 2.06E-49 |
| Rdx       | 2.73E-53 | 0.269159 | 0.75  | 0.576 | 4.55E-49 |
| Ssrp1     | 7.57E-53 | 0.254725 | 0.745 | 0.576 | 1.26E-48 |
| Ddx11     | 1.73E-52 | 0.272532 | 0.12  | 0.033 | 2.89E-48 |
| Pou4f1    | 1.8E-51  | 0.267518 | 0.151 | 0.056 | 2.99E-47 |

|         |          |          |       |       |          |
|---------|----------|----------|-------|-------|----------|
| Fkbp5   | 1.13E-50 | 0.252655 | 0.161 | 0.061 | 1.89E-46 |
| Rad54l  | 4.92E-50 | 0.295425 | 0.17  | 0.065 | 8.2E-46  |
| Cdh15   | 1.03E-49 | 0.324709 | 0.131 | 0.042 | 1.73E-45 |
| Sltm    | 1.06E-48 | 0.253639 | 0.682 | 0.518 | 1.77E-44 |
| Fam111a | 7.75E-48 | 0.262702 | 0.207 | 0.097 | 1.29E-43 |
| Maz     | 1.13E-47 | 0.279939 | 0.16  | 0.062 | 1.89E-43 |
| Mest    | 1.39E-47 | 0.26026  | 0.147 | 0.056 | 2.33E-43 |
| Acat1   | 7.63E-47 | 0.262623 | 0.568 | 0.405 | 1.27E-42 |
| Eif4e3  | 1.04E-45 | 0.253937 | 0.22  | 0.108 | 1.73E-41 |
| Chtf18  | 2.35E-45 | 0.253315 | 0.109 | 0.031 | 3.92E-41 |
| Khdrbs3 | 1.45E-44 | 0.255082 | 0.121 | 0.04  | 2.42E-40 |
| Cep290  | 1.26E-41 | 0.267639 | 0.25  | 0.139 | 2.09E-37 |
| Nefm    | 5.9E-40  | 0.256578 | 0.19  | 0.095 | 9.85E-36 |
| Tmsb10  | 3.48E-38 | 0.266372 | 0.74  | 0.605 | 5.8E-34  |
| Cntn2   | 1.95E-36 | 0.256506 | 0.225 | 0.136 | 3.25E-32 |
| Dynll1  | 1.31E-35 | 0.267059 | 0.682 | 0.552 | 2.19E-31 |
